# Supplementary material for: Molecular characterization of the RNA-protein complex directing −2/−1 programmed ribosomal frameshifting during arterivirus replicase expression
Source: PubMed Central journal article supplement (PMC7939443; doi:10.1074/jbc.ra120.016105), 2021-01-13
Supplement: mmc1.pdf [file mmc1.pdf]

**Molecular characterization of the RNA-protein complex directing -2/-1 programmed ribosomal frameshifting during arterivirus replicase expression**

Ankoo Patel, Emmely E. Treffers, Markus Meier, Trushar R. Patel, Jörg Stetefeld, Eric J. Snijder, Brian L. Mark<sup>1\*</sup>

**Supporting Information**

*Table S1. Primers used for nsp1 $\beta$  and PCBP2 mutations for EMSAs*

| <b>Oligo Name</b>          | <b>Sequence (5' to 3')</b> |
|----------------------------|----------------------------|
| nsp1 $\beta$ Y131A Forward | CCAACGCAGGCTTCAAGTCCG      |
| nsp1 $\beta$ Y131A Reverse | AGCGCCTTACCATGCACGCCCC     |
| nsp1 $\beta$ R135A Forward | CAAGTCCGCGGCATGCGTGC       |
| nsp1 $\beta$ R135A Reverse | AGCGCGCGTTGGAGGTA CTTAC    |
| PCBP2 R40A Forward         | GGAGAGTGGTGCACGTATCAAC     |
| PCBP2 R40A Reverse         | TCCGCCATCTTCTTAACTGATTC    |
| PCBP2 R57A Forward         | TATCACTTTGGCTGGACCCAC      |
| PCBP2 R57A Reverse         | ATCGCCTCAGGACAATTCCCTTC    |
| PCBP2 N325D Forward        | CAAAATTGCGGATCCAGTGGAAGG   |
| PCBP2 N325D Reverse        | ATCTGCGCCCCAGACATC         |

Table S2. Primers used for frameshifting assays

| <b>Oligo Name</b> | <b>Sequence (5' to 3')</b>             | <b>Purpose</b>                  |
|-------------------|----------------------------------------|---------------------------------|
| EUnsp1b-G129A-fw  | GGGCGTGCATGCTAAGTACCTCCAACGCAG         | Site directed mutagenesis G129A |
| EUnsp1b-G129A-rev | TGGAGGTACTTAGCATGCACGCCCACTTGG         | Site directed mutagenesis G129A |
| EUnsp1b-K130A-fw  | GGCGTGCATGGTGCUTACCTCCAACGCAG          | Site directed mutagenesis K130A |
| EUnsp1b-K130A-rev | TGCGTTGGAGGTAAGCACCATGCACGCC           | Site directed mutagenesis K130A |
| EUnsp1b-Y131A-fw  | TGCATGGTAAGGCCCTCCAACGCAGGCTTC         | Site directed mutagenesis Y131A |
| EUnsp1b-Y131A-rev | TGCGTTGGAGGGCCTTACCATGCACGCCCC         | Site directed mutagenesis Y131A |
| EUnsp1b-L132A-fw  | GCATGGTAAGTACGCCCAACGCAGGCTTCAAGT<br>C | Site directed mutagenesis L132A |
| EUnsp1b-L132A-rev | GAAGCCTGCGTTGGGCGTACTTACCATGCACG       | Site directed mutagenesis L132A |
| EUnsp1b-Q133A-fw  | TAAGTACCTCGCACGCAGGCTTCAAGTCCG         | Site directed mutagenesis Q133A |
| EUnsp1b-Q133A-rev | GAAGCCTGCGTGCGAGGTAAGTACTTACCATGCAC    | Site directed mutagenesis Q133A |

|                   |                                 |                                    |
|-------------------|---------------------------------|------------------------------------|
| EUnsp1b-L136A-fw  | CCAACGCAGGGCTCAAGTCCGCGGCATGC   | Site directed mutagenesis<br>L136A |
| EUnsp1b-L136A-rev | CATGCCGCGGACTTGAGCCCTGCGTTGGAG  | Site directed mutagenesis<br>L136A |
| EUnsp1b-Q137A-fw  | TCCAACGCAGGCTTGCAGTCCGCGGCATGC  | Site directed mutagenesis<br>Q137A |
| EUnsp1b-Q137A-rev | CCGCGGACTGCAAGCCTGCGTTGGAGGTAC  | Site directed mutagenesis<br>Q137A |
| EUnsp1b-V138A-fw  | GCAGGCTTCAAGCCCGCGGCATGCGTGCTG  | Site directed mutagenesis<br>V138A |
| EUnsp1b-V138A-rev | GCATGCCGCGGGCTTGAAGCCTGCGTTGGAG | Site directed mutagenesis<br>V138A |
| EUnsp1b-R139A-fw  | CTTCAAGTCGCTGGCATGCGTGCTGTGGTC  | Site directed mutagenesis<br>R139A |
| EUnsp1b-R139A-rev | CACAGCACGCATGCCAGCGACTTGAAGCC   | Site directed mutagenesis<br>R139A |
| EUnsp1b-G140A-fw  | TTCAAGTCCGCGCCATGCGTGCTGTGGTCG  | Site directed mutagenesis<br>G140A |
| EUnsp1b-G140A-rev | CAGCACGCATGGCGCGGACTTGAAGCCTGC  | Site directed mutagenesis<br>G140A |

|                   |                                                                                                                   |                                                                                |
|-------------------|-------------------------------------------------------------------------------------------------------------------|--------------------------------------------------------------------------------|
| EUnsp1b-M141A-fw  | AGTCCGCGGCGCTCGTGCTGTGGTCGATCC                                                                                    | Site directed mutagenesis M141A                                                |
| EUnsp1b-M141A-rev | CCACAGCACGAGCGCCGCGGACTTGAAGCC                                                                                    | Site directed mutagenesis M141A                                                |
| EUnsp1b-R142A-fw  | CCGCGGCATGGCTGCTGTGGTCGATCCTG                                                                                     | Site directed mutagenesis R142A                                                |
| EUnsp1b-R142A-rev | CGACCACAGCAGCCATGCCGCGGACTTGAAG                                                                                   | Site directed mutagenesis R142A                                                |
| EUnsp1b-fw        | ACGAGAATTCCCATGGATGTCTGACGTTTACAG<br>GTGGAAG                                                                      | Amplify EUnsp1b and introduce upstream EcoRI and NcoI sites                    |
| 3xFLAG-EUnsp1b-fw | GCCGAATTCCCATGGACTACAAAGACCATGACG<br>GTGATTATAAAGATCATGACATCGATTACAAGG<br>ATGACGATGACAAGTCTGACGTTTACAGGTGGA<br>AG | Amplify EUnsp1b and introduce upstream 3xFLAG tag and NcoI site                |
| EUnsp1b-rev       | ATCACCTGCAGGGCGGCCGCTCGAGTCAGCCA<br>TACCACTTATGTG                                                                 | Amplify EUnsp1b and introduce downstream XhoI, NotI and SbfI restriction sites |
| pL-seq            | GATCTGATCTGGGGCCTC                                                                                                | Sequencing pL vector                                                           |



## Part 2

# Biophysical characterization

| <i>Parameters</i>                                                                                                                   |                                                                                                                                                           |
|-------------------------------------------------------------------------------------------------------------------------------------|-----------------------------------------------------------------------------------------------------------------------------------------------------------|
| <b>Solvent</b><br>1x PBS (pH 7.4 @ 25°C), 100 mM KCl, 5% glycerol                                                                   | 2.027 mM sodium dihydrogen phosphate<br>7.973 mM disodium hydrogen phosphate<br>138 mM sodium chloride<br>102.7 mM potassium chloride<br>~684 mM glycerol |
| <b>Solvent density<sup>1</sup> <math>\rho</math> (g/cm<sup>3</sup>)</b>                                                             | 1.0354 ± 0.0005                                                                                                                                           |
| <b>Buffer viscosity<sup>1</sup> <math>\eta</math> (P)</b>                                                                           | 0.01235 ± 0.0002                                                                                                                                          |
| <b>Temperature T (°C)</b>                                                                                                           | 20.0                                                                                                                                                      |
| <b>his<sub>6</sub>-PCBP2 partial specific volume<sup>1</sup> <math>\bar{v}</math> (cm<sup>3</sup>/g)</b>                            | 0.73318                                                                                                                                                   |
| <b>his<sub>6</sub>-PCBP2 formula mass<sup>2</sup> <math>M_w</math> (kDa)</b>                                                        | 39749.32                                                                                                                                                  |
| <b>his<sub>6</sub>-PCBP2 absorption coefficient<sup>2</sup> <math>\epsilon_{280}</math> (M<sup>-1</sup> cm<sup>-1</sup>)</b>        | 14815                                                                                                                                                     |
| <b>PRRSV nsp1<math>\beta</math> partial specific volume<sup>1</sup> <math>\bar{v}</math> (cm<sup>3</sup>/g)</b>                     | 0.72777                                                                                                                                                   |
| <b>PRRSV nsp1<math>\beta</math> formula mass<sup>2</sup> <math>M_w</math> (kDa)</b>                                                 | 23786.87                                                                                                                                                  |
| <b>PRRSV nsp1<math>\beta</math> absorption coefficient<sup>2</sup> <math>\epsilon_{280}</math> (M<sup>-1</sup> cm<sup>-1</sup>)</b> | 46200                                                                                                                                                     |
| <b>34nt ssRNA partial specific volume <math>\bar{v}</math> (cm<sup>3</sup>/g)</b>                                                   | dependent on cation concentration<br>expected range 0.50 - 0.65                                                                                           |
| <b>34nt ssRNA formula mass<sup>3</sup> <math>M_w</math> (kDa)</b>                                                                   | 10688.3                                                                                                                                                   |
| <b>34nt ssRNA absorption coefficient<sup>3</sup> <math>\epsilon_{260}</math> (M<sup>-1</sup> cm<sup>-1</sup>)</b>                   | 323000                                                                                                                                                    |

<sup>1</sup>Sednterp, <sup>2</sup>ProtParam, <sup>3</sup>IDTDNA

Table S3

# Section 1: Characterization of 34 nt ssRNA by Sedimentation Velocity

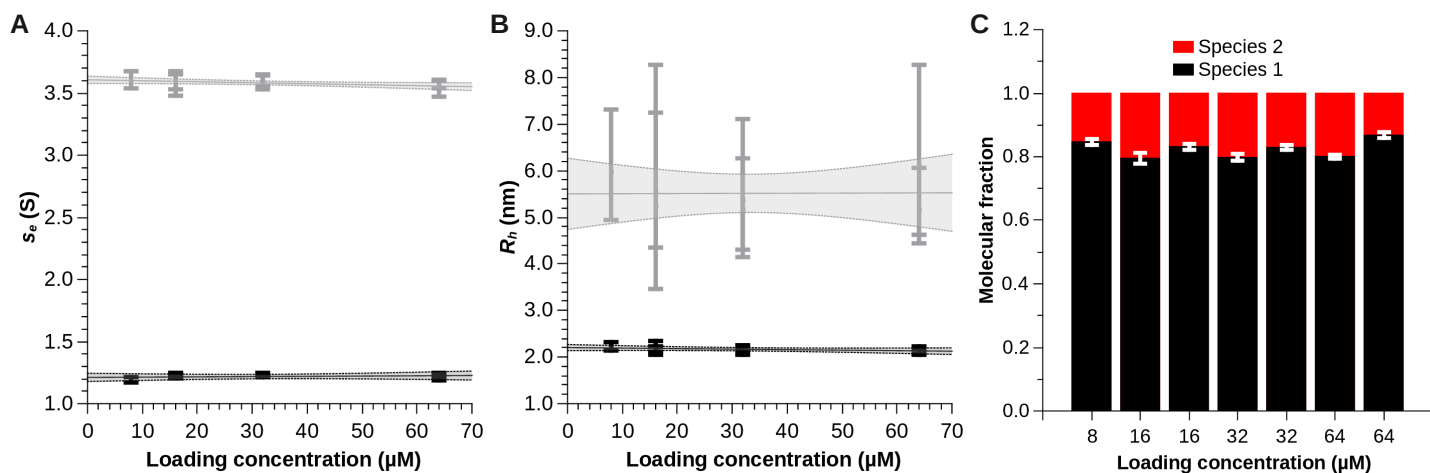

Fig. S1

## Results

| <i>Species 1</i>                                               |                                                |
|----------------------------------------------------------------|------------------------------------------------|
| Sedimentation coefficient $s_e^0$                              | $1.21 \pm 0.04$ S                              |
| Diffusion coefficient $D_e^0$                                  | $7.9 \pm 0.3 \cdot 10^{-7}$ cm <sup>2</sup> /s |
| Partial specific volume<br>that yields correct mass (10.7 kDa) | 0.62763 [0.60703 - 0.64704] cm <sup>3</sup> /g |
| Sedimentation coefficient $s_{20^\circ\text{C}, w}^0$          | 1.59 [1.54 - 1.65] S                           |
| Hydrodynamic radius $R_h^0$                                    | 2.20 [2.12 - 2.29] nm                          |
| <i>Species 2</i>                                               |                                                |
| Sedimentation coefficient $s_e^0$                              | $3.61 \pm 0.03$ S                              |
| Diffusion coefficient $D_e^0$                                  | $3.2 \pm 0.5 \cdot 10^{-7}$ cm <sup>2</sup> /s |
| Sedimentation coefficient $s_{20^\circ\text{C}, w}^0$          | 4.74 [4.65 - 4.83] S                           |
| Hydrodynamic radius $R_h^0$                                    | 5.49 [4.84 - 6.35] nm                          |
| Molecular mass<br>if RNA; would contain 7-8 strands            | 79.3 [68.2 - 90.5] kDa                         |

Uncertainties are given as 95% confidence intervals

Table S4

8  $\mu\text{M}$  ssRNA monitored by absorbance optics  
30000 rpm,  $\lambda = 278 \text{ nm}$

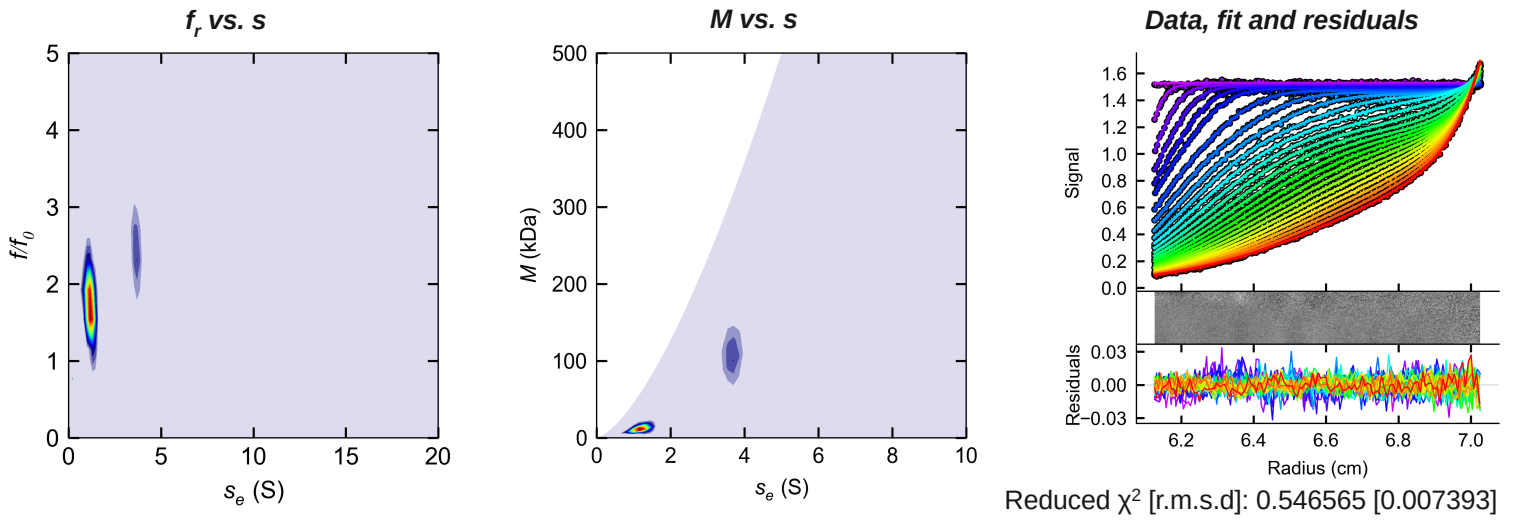

Species Analysis (30000 rpm,  $\lambda = 278 \text{ nm}$ , exp. # 1)

| Parameter                                                             | Value       | 95% confidence interval |
|-----------------------------------------------------------------------|-------------|-------------------------|
| <b>Species 1</b>                                                      |             |                         |
| Sedimentation coefficient $s_e$ (S)                                   | 1.191056    | 1.1725 - 1.2098         |
| Diffusion coefficient $D_e$ ( $\cdot 10^{-7} \text{ cm}^2/\text{s}$ ) | 7.826990    | 7.5122 - 8.1480         |
| <b>Species 2</b>                                                      |             |                         |
| Sedimentation coefficient $s_e$ (S)                                   | 3.605013    | 3.5373 - 3.6741         |
| Diffusion coefficient $D_e$ ( $\cdot 10^{-7} \text{ cm}^2/\text{s}$ ) | 2.905149    | 2.3804 - 3.5159         |
| Fraction (signal)                                                     | 0.153196    | 0.1439 - 0.1631         |
| <b>Common</b>                                                         |             |                         |
| Total concentration (signal)                                          | 1.508362    | 1.4841 - 1.5328         |
| Meniscus position (cm)                                                | 6.081005    | 6.0774 - 6.0844         |
| Bottom position (cm)                                                  | 7.237708    | 7.2307 - 7.2447         |
| Reduced $\chi^2$ of fit [rmsd]                                        | 0.5652639   |                         |
| R.m.s.d. of fit                                                       | 0.007518403 |                         |

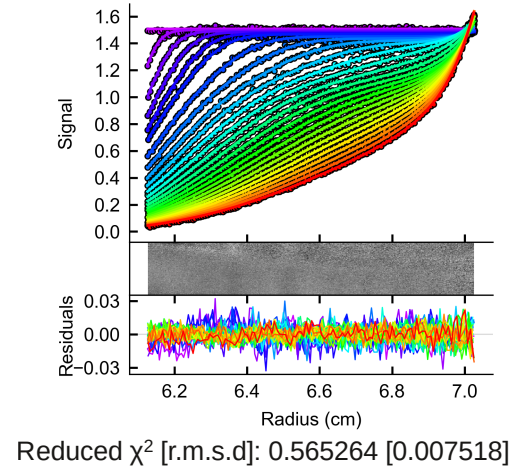

16  $\mu\text{M}$  ssRNA monitored by absorbance optics

42000 rpm,  $\lambda = 294 \text{ nm}$

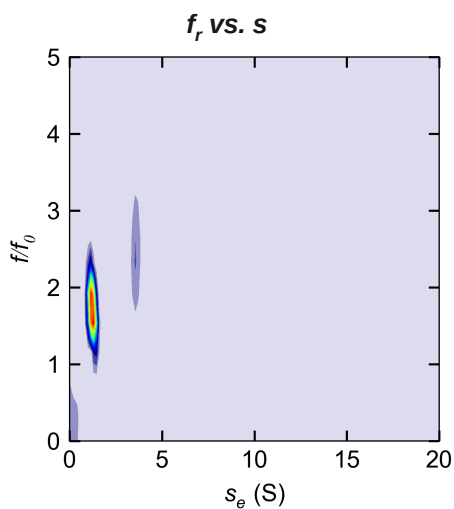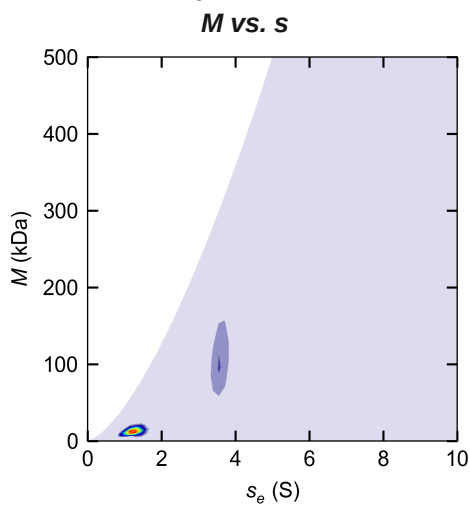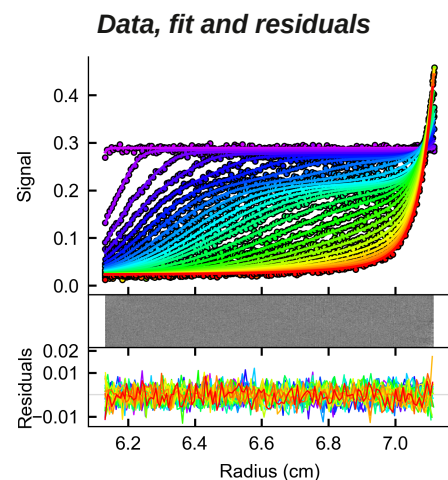

Reduced  $\chi^2$  [r.m.s.d]: 0.120617 [0.003473]

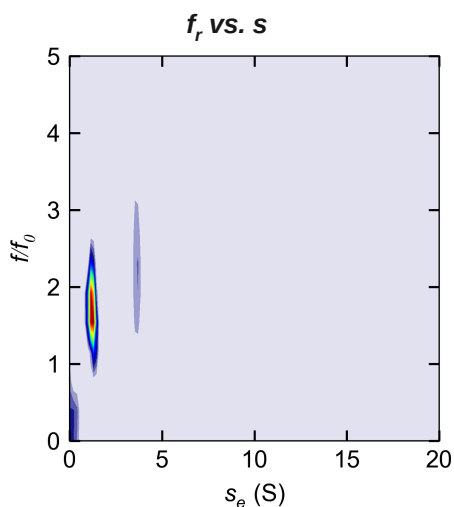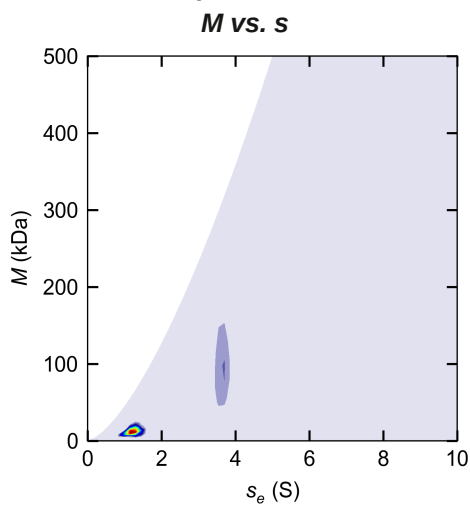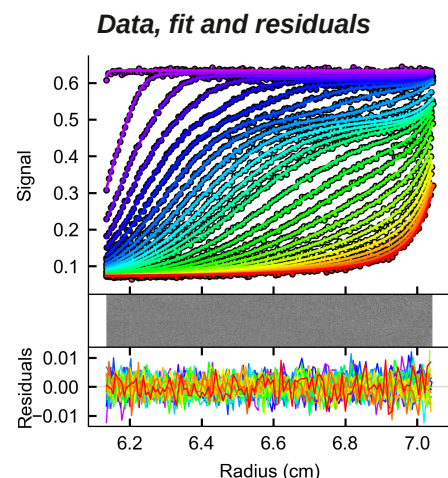

Reduced  $\chi^2$  [r.m.s.d]: 0.112694 [0.003357]

Species Analysis (42000 rpm,  $\lambda = 294 \text{ nm}$ , exp. # 1)

| Parameter                                                             | Value       | 95% confidence interval |
|-----------------------------------------------------------------------|-------------|-------------------------|
| <b>Species 1</b>                                                      |             |                         |
| Sedimentation coefficient $s_e$ (S)                                   | 1.229725    | 1.2078 - 1.2518         |
| Diffusion coefficient $D_e$ ( $\cdot 10^{-7} \text{ cm}^2/\text{s}$ ) | 7.837109    | 7.4467 - 8.2514         |
| <b>Species 2</b>                                                      |             |                         |
| Sedimentation coefficient $s_e$ (S)                                   | 3.579254    | 3.4808 - 3.6784         |
| Diffusion coefficient $D_e$ ( $\cdot 10^{-7} \text{ cm}^2/\text{s}$ ) | 3.316965    | 2.1005 - 5.0301         |
| Fraction (signal)                                                     | 0.204758    | 0.1884 - 0.2216         |
| <b>Common</b>                                                         |             |                         |
| Total concentration (signal)                                          | 0.2623926   | 0.2545 - 0.2705         |
| Meniscus position (cm)                                                | 6.113078    | 6.1073 - 6.1188         |
| Bottom position (cm)                                                  | 7.227485    | 7.2230 - 7.2323         |
| Reduced $\chi^2$ of fit [rmsd]                                        | 0.1228484   |                         |
| R.m.s.d. of fit                                                       | 0.003504974 |                         |

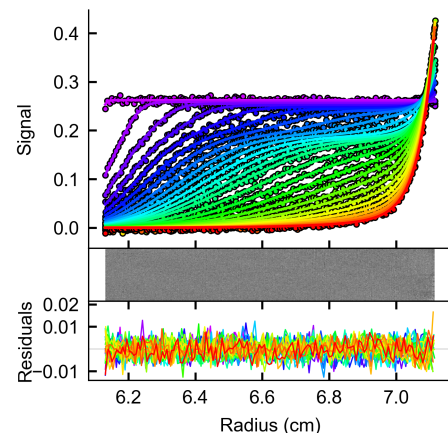

Reduced  $\chi^2$  [r.m.s.d]: 0.122848 [0.003505]

Species Analysis (42000 rpm,  $\lambda = 291 \text{ nm}$ , exp. # 2)

| Parameter                                                             | Value       | 95% confidence interval |
|-----------------------------------------------------------------------|-------------|-------------------------|
| <b>Species 1</b>                                                      |             |                         |
| Sedimentation coefficient $s_e$ (S)                                   | 1.215424    | 1.2044 - 1.2265         |
| Diffusion coefficient $D_e$ ( $\cdot 10^{-7} \text{ cm}^2/\text{s}$ ) | 8.173451    | 7.8048 - 8.4944         |
| <b>Species 2</b>                                                      |             |                         |
| Sedimentation coefficient $s_e$ (S)                                   | 3.590108    | 3.5299 - 3.6475         |
| Diffusion coefficient $D_e$ ( $\cdot 10^{-7} \text{ cm}^2/\text{s}$ ) | 3.140034    | 2.3970 - 4.0048         |
| Fraction (signal)                                                     | 0.168034    | 0.1588 - 0.1769         |
| <b>Common</b>                                                         |             |                         |
| Total concentration (signal)                                          | 0.5605898   | 0.1588 - 0.1769         |
| Meniscus position (cm)                                                | 6.117462    | 6.1147 - 6.1205         |
| Bottom position (cm)                                                  | 7.234521    | 7.2271 - 7.2411         |
| Reduced $\chi^2$ of fit [rmsd]                                        | 0.1260963   |                         |
| R.m.s.d. of fit                                                       | 0.003551004 |                         |

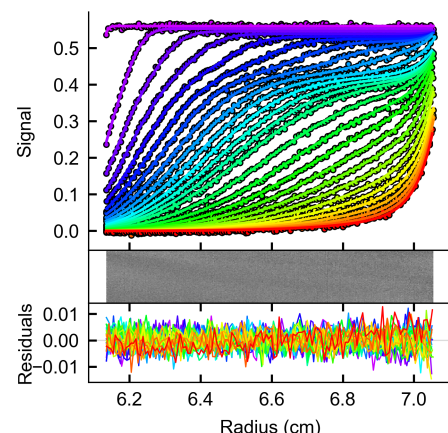

Reduced  $\chi^2$  [r.m.s.d]: 0.126096 [0.003551]

32  $\mu\text{M}$  ssRNA monitored by absorbance optics

42000 rpm,  $\lambda = 294 \text{ nm}$

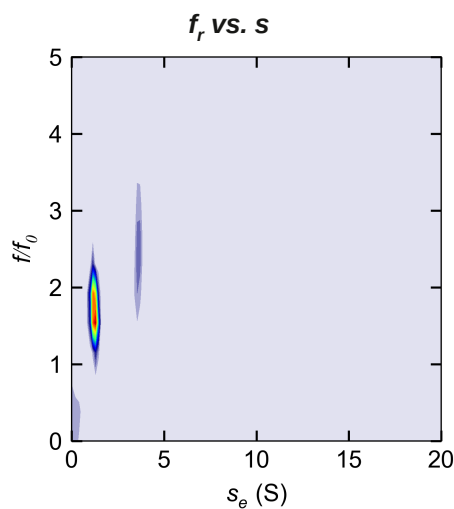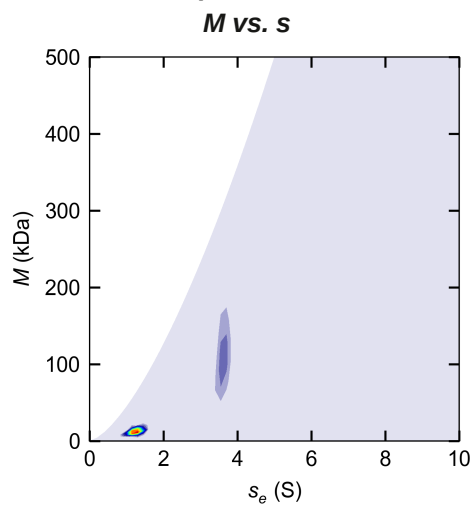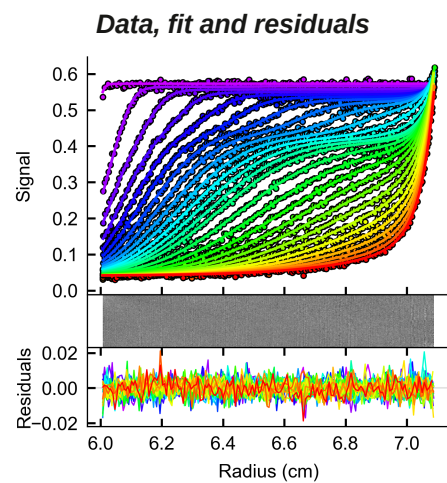

Reduced  $\chi^2$  [r.m.s.d]: 0.191756 [0.004379]

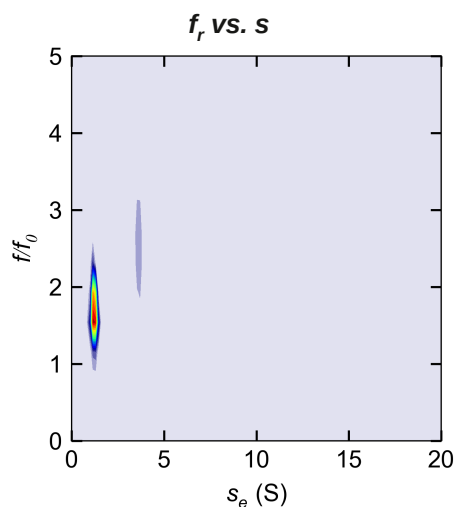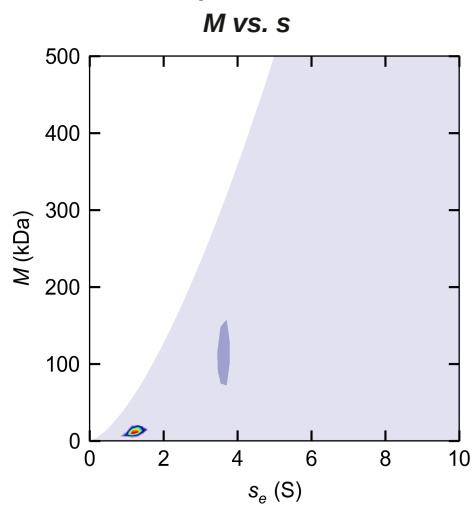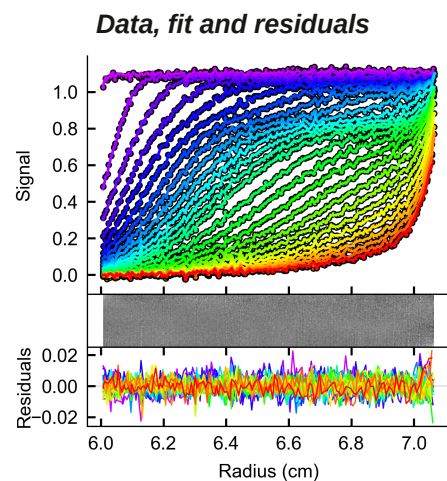

Reduced  $\chi^2$  [r.m.s.d]: 0.259183 [0.005091]

Species Analysis (42000 rpm,  $\lambda = 294 \text{ nm}$ , exp. # 1)

| Parameter                                                             | Value       | 95% confidence interval |
|-----------------------------------------------------------------------|-------------|-------------------------|
| <b>Species 1</b>                                                      |             |                         |
| Sedimentation coefficient $s_e$ (S)                                   | 1.232830    | 1.2201 - 1.2468         |
| Diffusion coefficient $D_e$ ( $\cdot 10^{-7} \text{ cm}^2/\text{s}$ ) | 8.121437    | 7.7671 - 8.5080         |
| <b>Species 2</b>                                                      |             |                         |
| Sedimentation coefficient $s_e$ (S)                                   | 3.585519    | 3.5308 - 3.6467         |
| Diffusion coefficient $D_e$ ( $\cdot 10^{-7} \text{ cm}^2/\text{s}$ ) | 3.231844    | 2.4451 - 4.1974         |
| Fraction (signal)                                                     | 0.202133    | 0.1919 - 0.2126         |
| <b>Common</b>                                                         |             |                         |
| Total concentration (signal)                                          | 0.5306498   | 0.5205 - 0.5417         |
| Meniscus position (cm)                                                | 5.986057    | 5.9823 - 5.9896         |
| Bottom position (cm)                                                  | 7.236567    | 7.2309 - 7.2428         |
| Reduced $\chi^2$ of fit [rmsd]                                        | 0.1983076   |                         |
| R.m.s.d. of fit                                                       | 0.004453174 |                         |

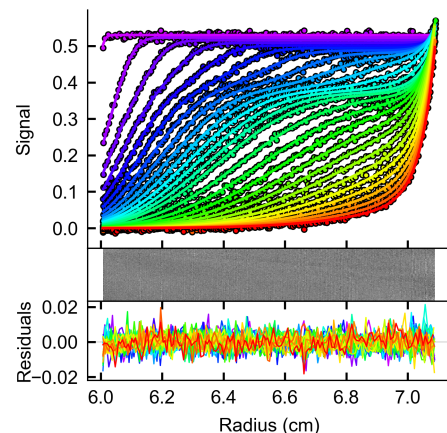

Reduced  $\chi^2$  [r.m.s.d]: 0.198308 [0.004453]

Species Analysis (42000 rpm,  $\lambda = 291 \text{ nm}$ , exp. # 2)

| Parameter                                                             | Value       | 95% confidence interval |
|-----------------------------------------------------------------------|-------------|-------------------------|
| <b>Species 1</b>                                                      |             |                         |
| Sedimentation coefficient $s_e$ (S)                                   | 1.220184    | 1.2127 - 1.2280         |
| Diffusion coefficient $D_e$ ( $\cdot 10^{-7} \text{ cm}^2/\text{s}$ ) | 7.938753    | 7.7172 - 8.1994         |
| <b>Species 2</b>                                                      |             |                         |
| Sedimentation coefficient $s_e$ (S)                                   | 3.596446    | 3.5560 - 3.6386         |
| Diffusion coefficient $D_e$ ( $\cdot 10^{-7} \text{ cm}^2/\text{s}$ ) | 3.366156    | 2.7780 - 4.0454         |
| Fraction (signal)                                                     | 0.170676    | 0.1640 - 0.1770         |
| <b>Common</b>                                                         |             |                         |
| Total concentration (signal)                                          | 1.088870    | 1.0756 - 1.1033         |
| Meniscus position (cm)                                                | 5.989551    | 5.9874 - 5.9917         |
| Bottom position (cm)                                                  | 7.235867    | 7.2314 - 7.2412         |
| Reduced $\chi^2$ of fit [rmsd]                                        | 0.2852372   |                         |
| R.m.s.d. of fit                                                       | 0.005340760 |                         |

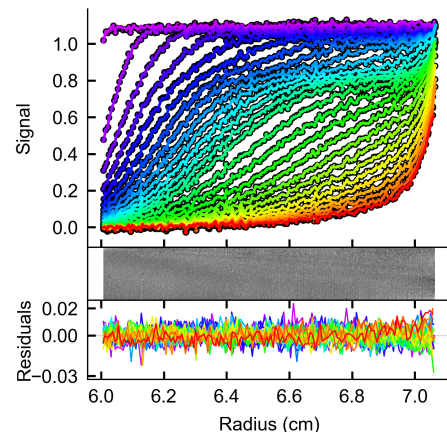

Reduced  $\chi^2$  [r.m.s.d]: 0.285237 [0.005341]



64  $\mu\text{M}$  ssRNA monitored by absorbance optics

42000 rpm,  $\lambda = 294 \text{ nm}$

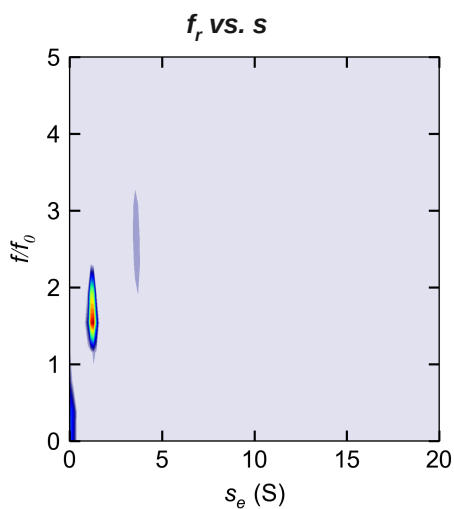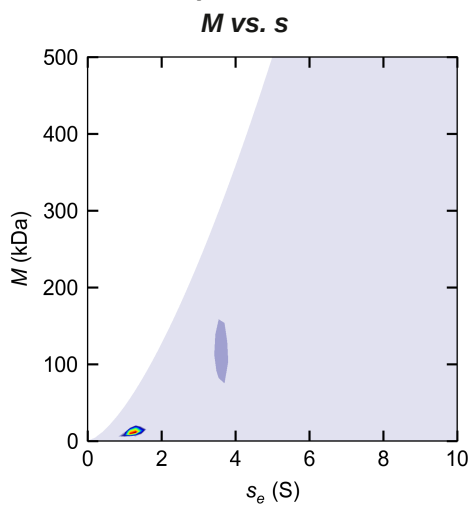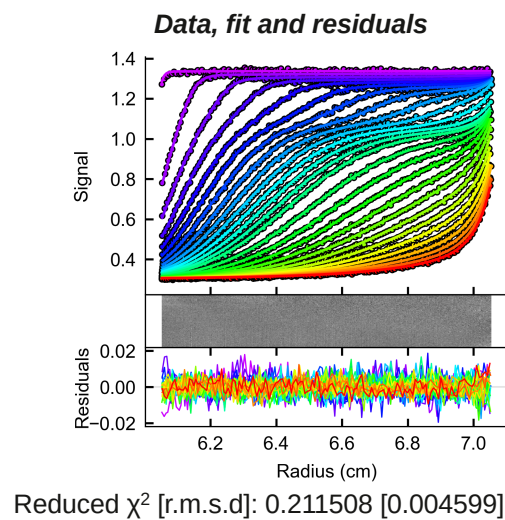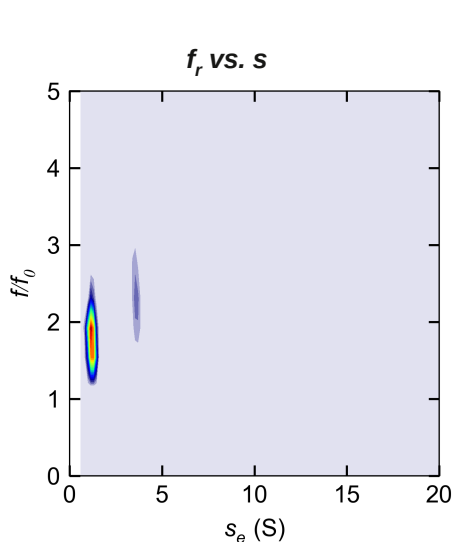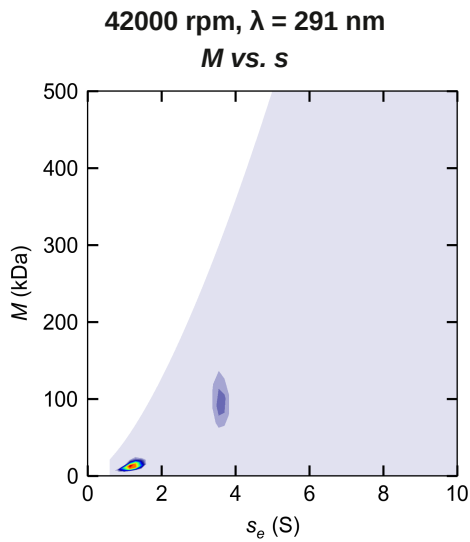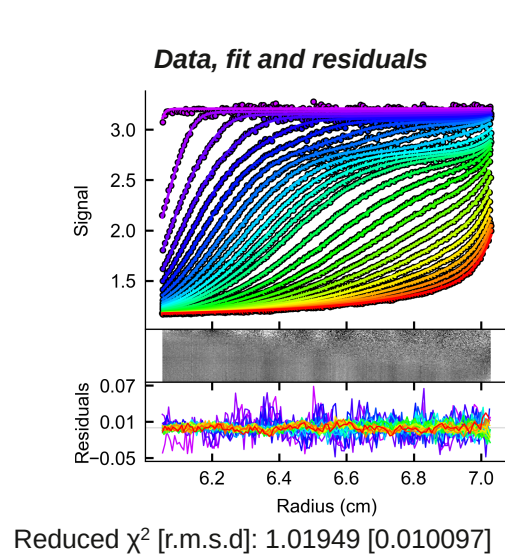

Species Analysis (42000 rpm,  $\lambda = 294 \text{ nm}$ , exp. # 1)

| Parameter                                                             | Value       | 95% confidence interval |
|-----------------------------------------------------------------------|-------------|-------------------------|
| <b>Species 1</b>                                                      |             |                         |
| Sedimentation coefficient $s_e$ (S)                                   | 1.239898    | 1.2324 - 1.2474         |
| Diffusion coefficient $D_e$ ( $\cdot 10^{-7} \text{ cm}^2/\text{s}$ ) | 8.170592    | 7.9399 - 8.4006         |
| <b>Species 2</b>                                                      |             |                         |
| Sedimentation coefficient $s_e$ (S)                                   | 3.572412    | 3.5362 - 3.6070         |
| Diffusion coefficient $D_e$ ( $\cdot 10^{-7} \text{ cm}^2/\text{s}$ ) | 3.355237    | 2.8711 - 3.9210         |
| Fraction (signal)                                                     | 0.198935    | 0.1930 - 0.2052         |
| <b>Common</b>                                                         |             |                         |
| Total concentration (signal)                                          | 1.024325    | 1.0124 - 1.0365         |
| Meniscus position (cm)                                                | 6.025673    | 6.0235 - 6.0279         |
| Bottom position (cm)                                                  | 7.241323    | 7.2362 - 7.2464         |
| Reduced $\chi^2$ of fit [rmsd]                                        | 0.2163596   |                         |
| R.m.s.d. of fit                                                       | 0.004651447 |                         |

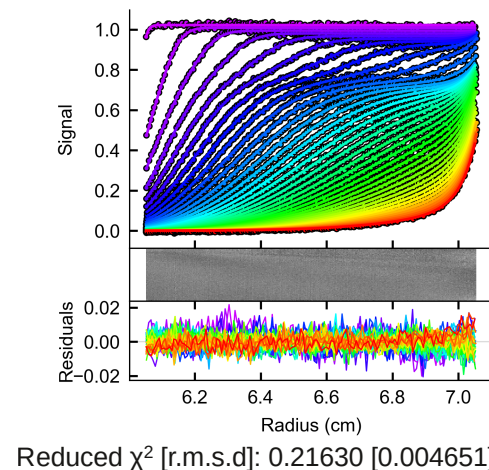

Species Analysis (42000 rpm,  $\lambda 291 \text{ nm}$ , exp. # 2)

| Parameter                                                             | Value       | 95% confidence interval |
|-----------------------------------------------------------------------|-------------|-------------------------|
| <b>Species 1</b>                                                      |             |                         |
| Sedimentation coefficient $s_e$ (S)                                   | 1.201514    | 1.1918 - 1.2113         |
| Diffusion coefficient $D_e$ ( $\cdot 10^{-7} \text{ cm}^2/\text{s}$ ) | 8.107909    | 7.7838 - 8.4409         |
| <b>Species 2</b>                                                      |             |                         |
| Sedimentation coefficient $s_e$ (S)                                   | 3.534074    | 3.4728 - 3.5943         |
| Diffusion coefficient $D_e$ ( $\cdot 10^{-7} \text{ cm}^2/\text{s}$ ) | 2.847448    | 2.1050 - 3.7689         |
| Fraction (signal)                                                     | 0.132244    | 0.1238 - 0.1408         |
| <b>Common</b>                                                         |             |                         |
| Total concentration (signal)                                          | 2.030704    | 1.9974 - 2.0654         |
| Meniscus position (cm)                                                | 6.027494    | 6.0247 - 6.0302         |
| Bottom position (cm)                                                  | 7.245158    | 7.2363 - 7.2544         |
| Reduced $\chi^2$ of fit [rmsd]                                        | 1.393352    |                         |
| R.m.s.d. of fit                                                       | 0.011804033 |                         |

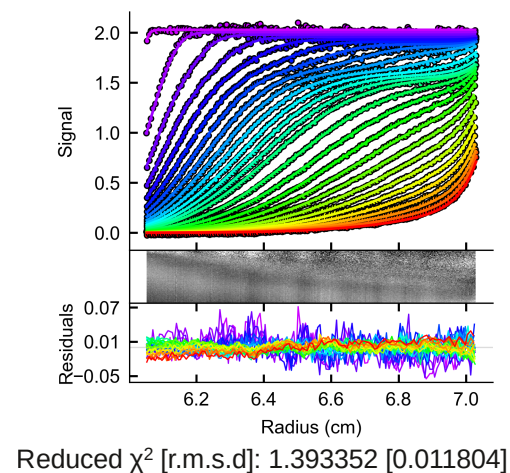

## **Section 2:**

# **Characterization of Human PCBP2, PRRSV nsp1- $\beta$ and PRRSV 34 nt ssRNA Complex by Sedimentation Velocity**

# Complex of human PCBP2, PRRSV nsp1- $\beta$ and PRRSV 34 nt ssRNA

Absorbance optics @ 30000 rpm - Signal mainly from RNA

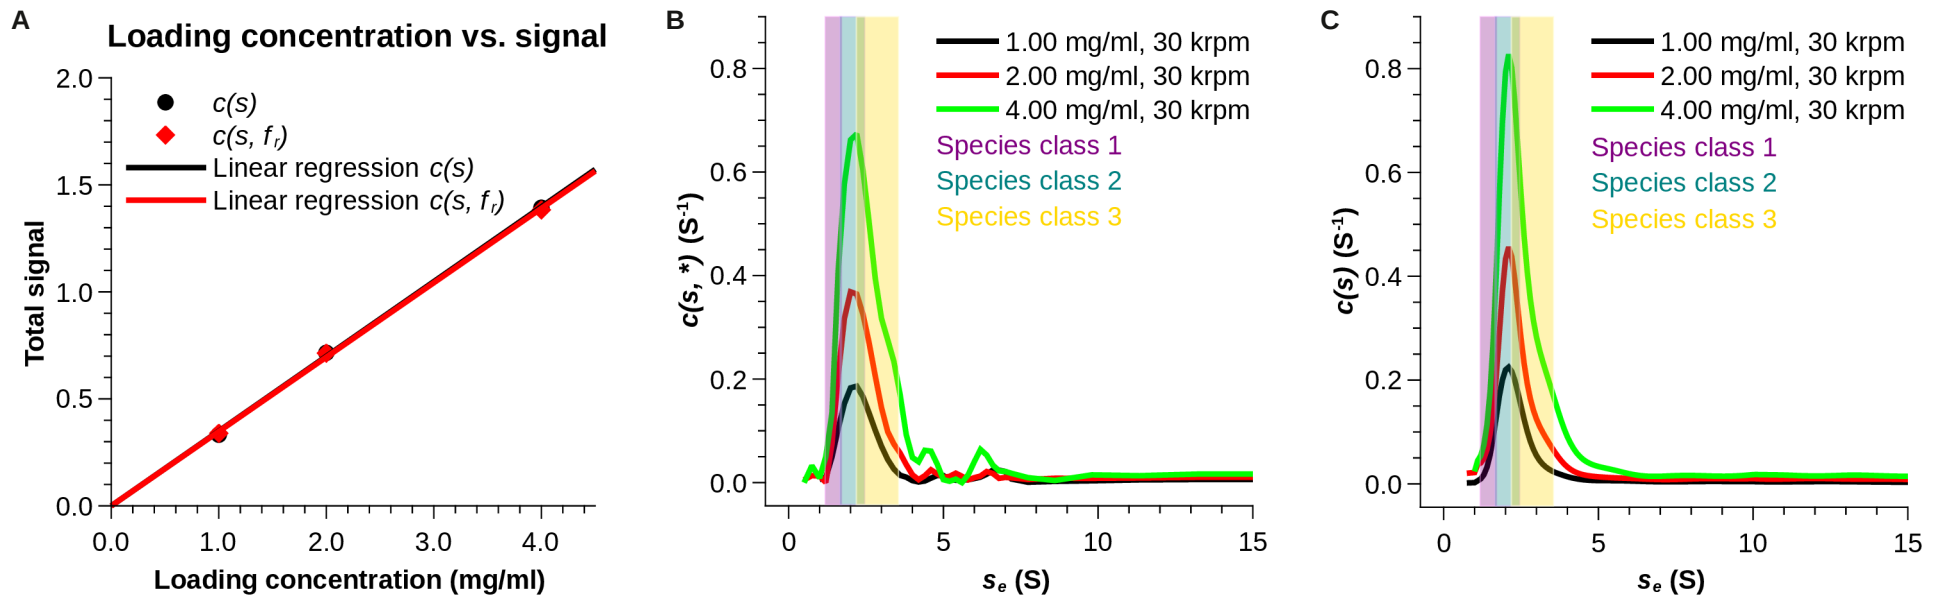

Interference optics @ 30000 rpm - Signal from all components

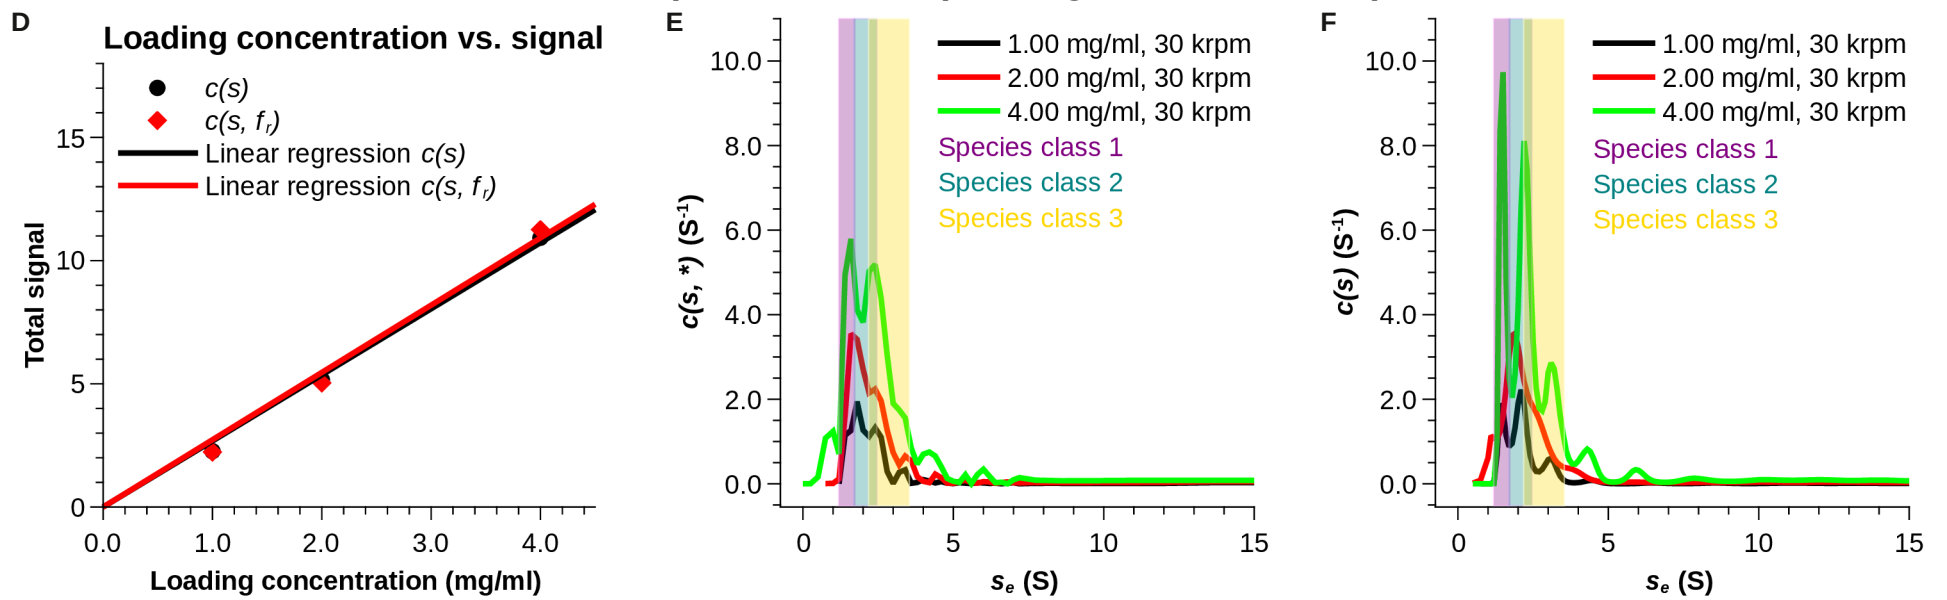

Absorbance optics @ 42000 rpm - Signal mainly from RNA

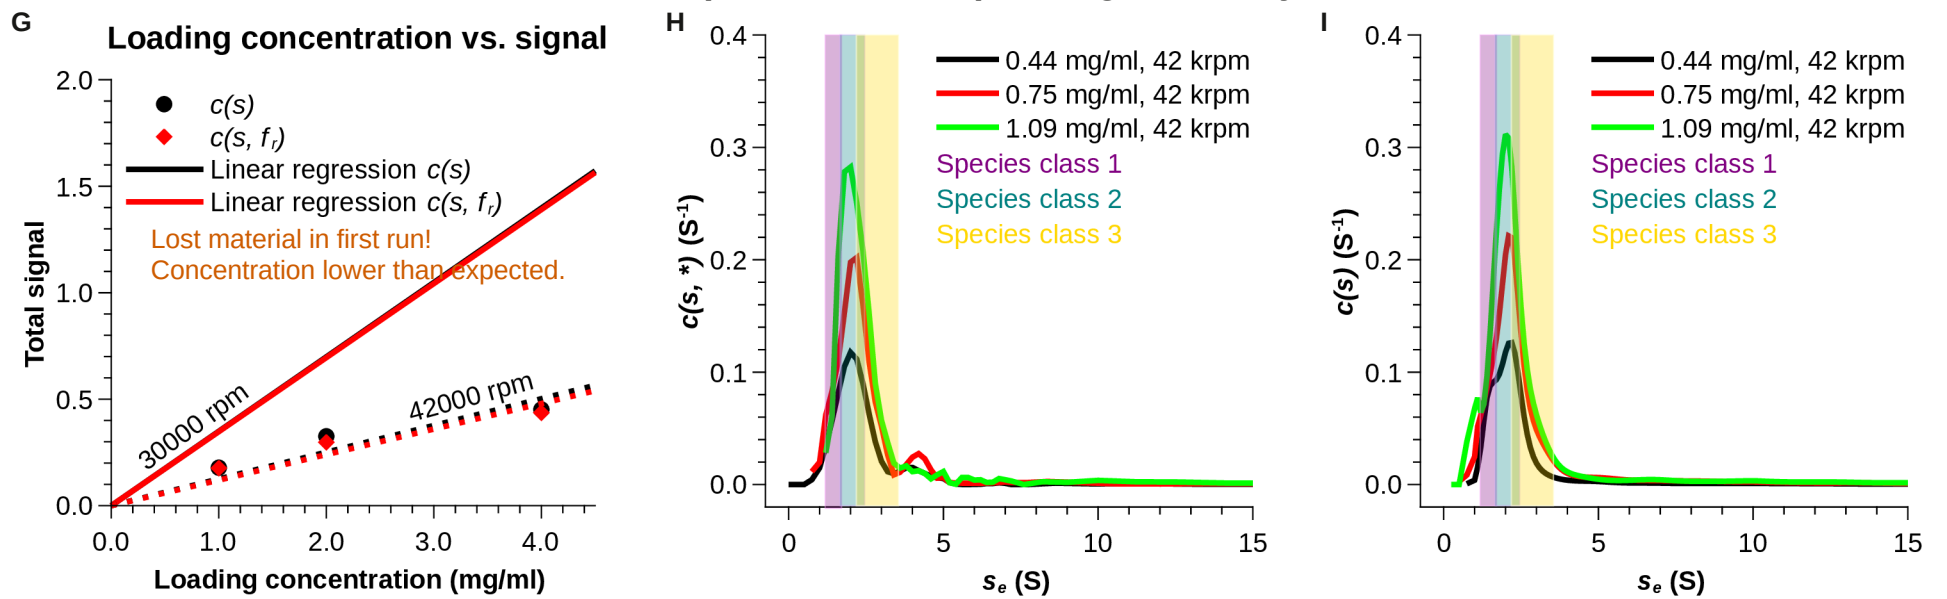

Interference optics @ 42000 rpm - Signal from all components

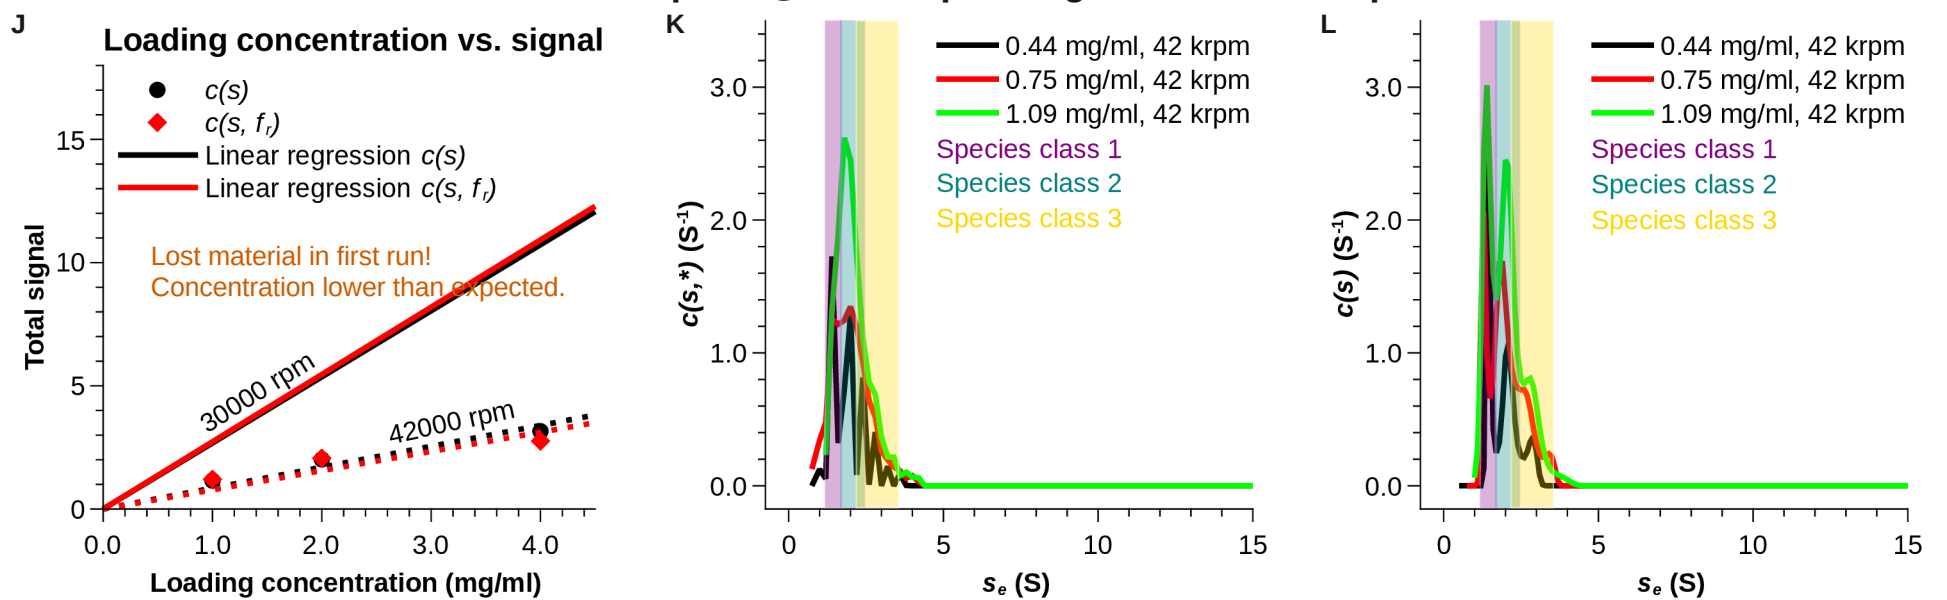

Fig. S3



## Species classes

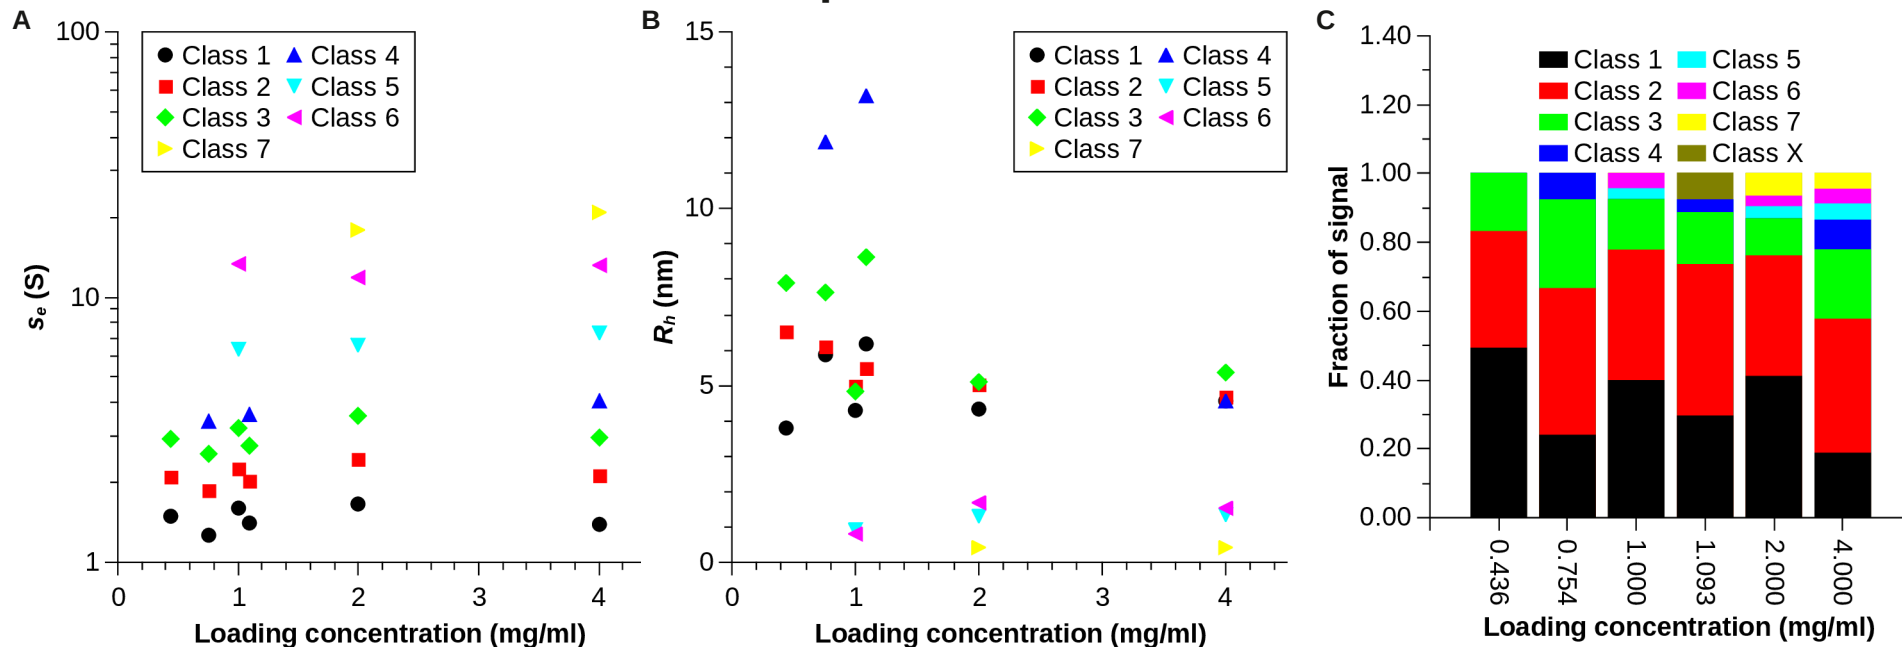

Fig. S4

### Results

| <i>Species class 1</i>                                  |                                                          |
|---------------------------------------------------------|----------------------------------------------------------|
| Sedimentation coefficient $s_{20^{\circ}\text{C}, w}^0$ | 2.02 [1.61 - 2.43] S                                     |
| Diffusion coefficient $D_{20^{\circ}\text{C}, w}^0$     | $4.52 [2.76 - 6.28] \cdot 10^{-7} \text{ cm}^2/\text{s}$ |
| Hydrodynamic radius $R_h^0$                             | 4.74 [3.41 - 7.74] nm                                    |
| <i>Species class 2</i>                                  |                                                          |
| Sedimentation coefficient $s_{20^{\circ}\text{C}, w}^0$ | 2.84 [2.28 - 3.41] S                                     |
| Diffusion coefficient $D_{20^{\circ}\text{C}, w}^0$     | $3.51 [2.87 - 4.15] \cdot 10^{-7} \text{ cm}^2/\text{s}$ |
| Hydrodynamic radius $R_h^0$                             | $6.11 \pm [5.17 - 7.46] \text{ nm}$                      |
| <i>Species class 3</i>                                  |                                                          |
| Sedimentation coefficient $s_{20^{\circ}\text{C}, w}^0$ | 3.96 [2.97 - 4.94] S                                     |
| Diffusion coefficient $D_{20^{\circ}\text{C}, w}^0$     | $2.92 [1.37 - 4.47] \cdot 10^{-7} \text{ cm}^2/\text{s}$ |
| Hydrodynamic radius $R_h^0$                             | 7.34 [4.79 - 15.61] nm                                   |

Table S5

# Results

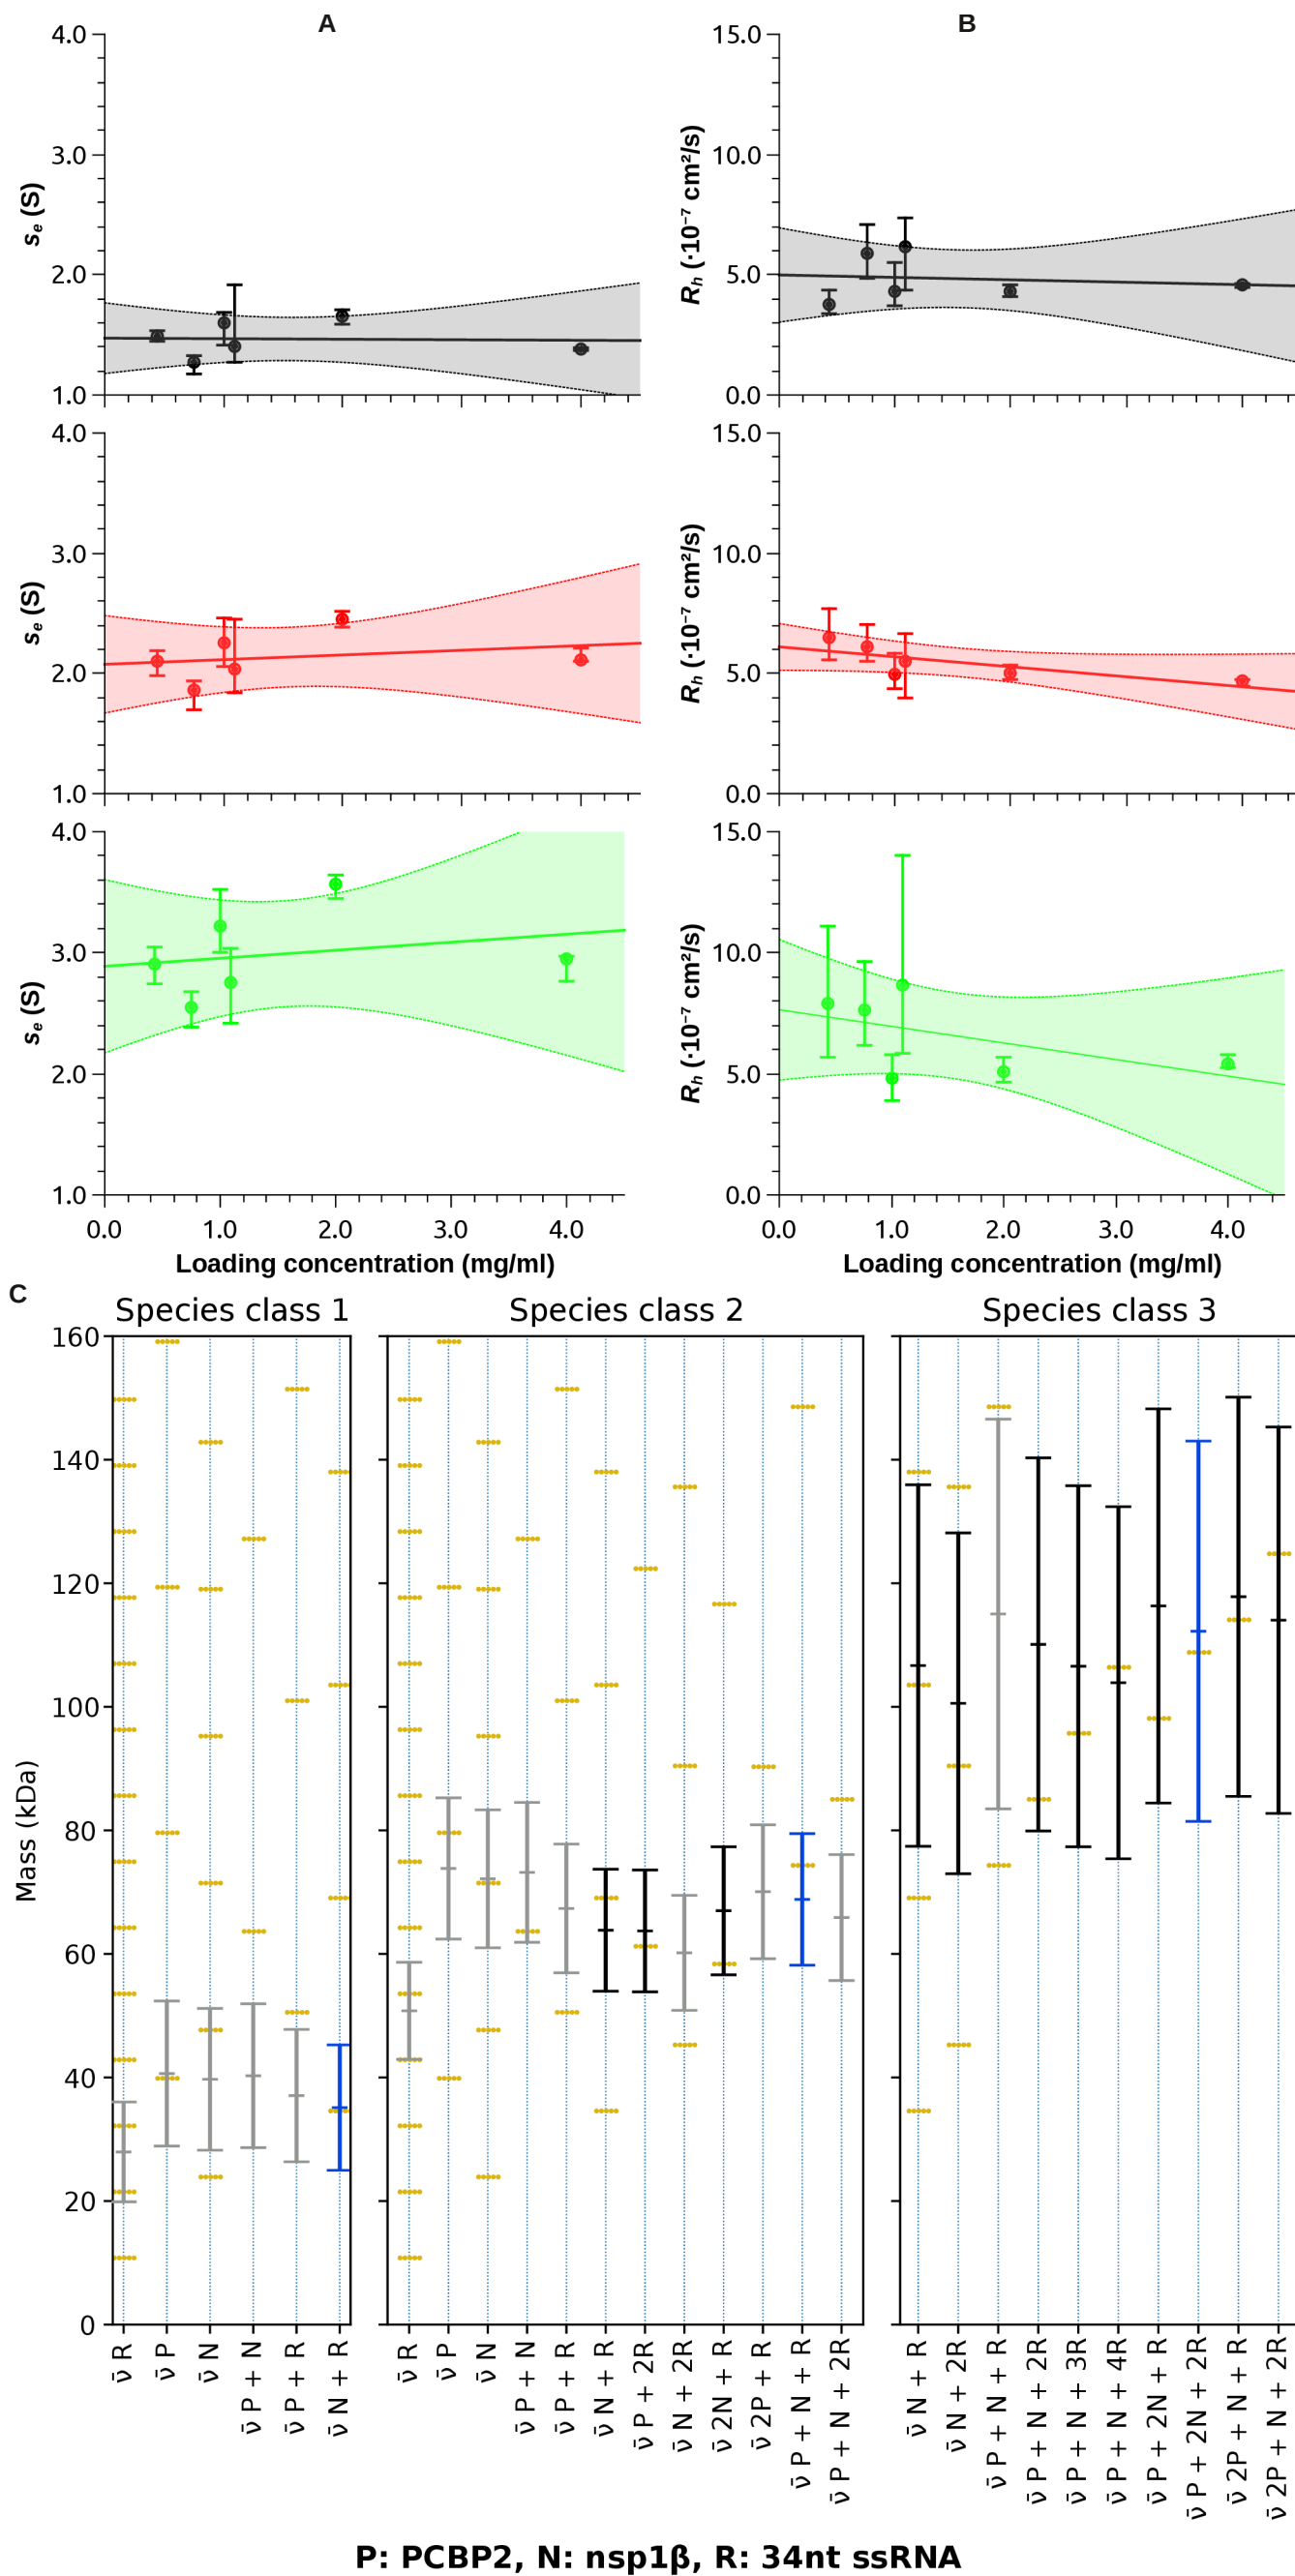

Fig. S5

# Complex of human PCBP2, PRRSV nsp1- $\beta$ and PRRSV 34 nt ssRNA

Absorbance optics @ 30000 rpm - loading concentration 1.0 mg/ml

$c(s, f_r)$  analysis

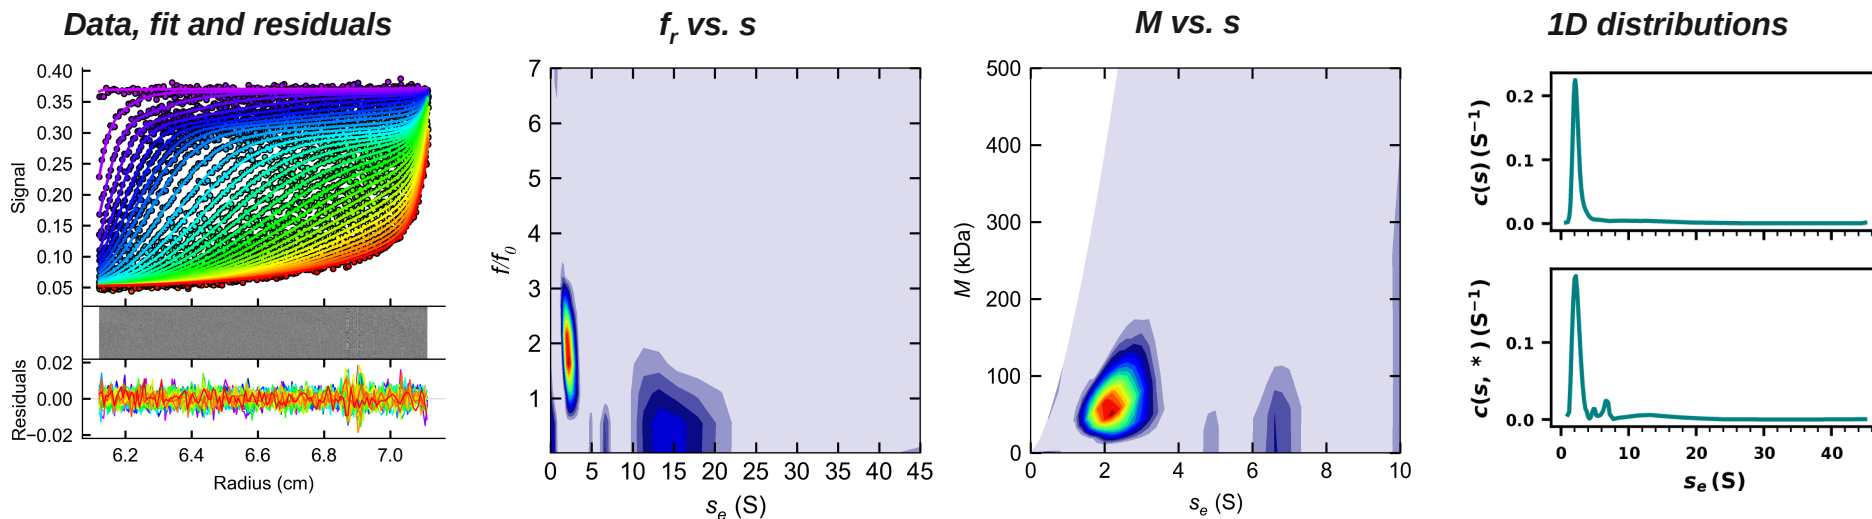

Reduced  $\chi^2$  [r.m.s.d]: [0.003905]

Absorbance optics @ 42000 rpm - actual concentration 0.44 mg/ml

$c(s, f_r)$  analysis

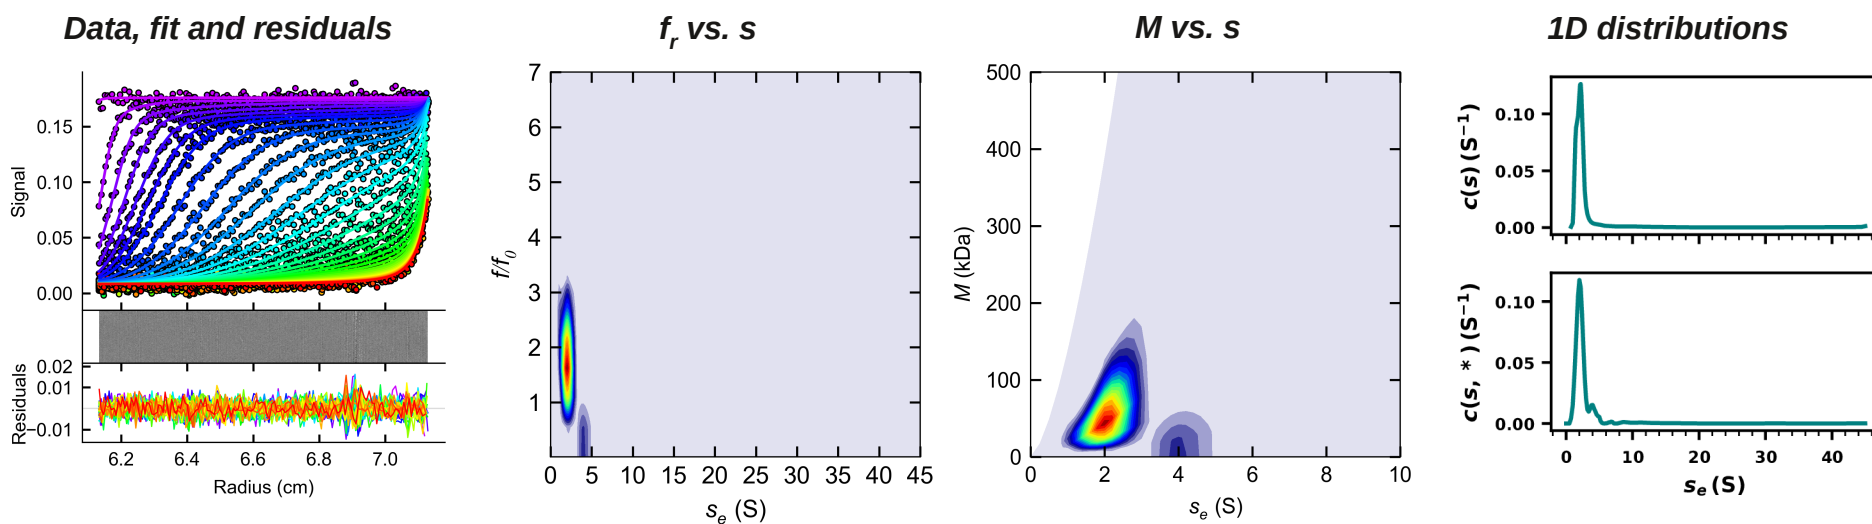

Reduced  $\chi^2$  [r.m.s.d]: [0.003341]

Fig. S6A

# Complex of human PCBP2, PRRSV nsp1- $\beta$ and PRRSV 34 nt ssRNA

Interference optics @ 30000 rpm - loading concentration 1.0 mg/ml

$c(s, f_r)$  analysis

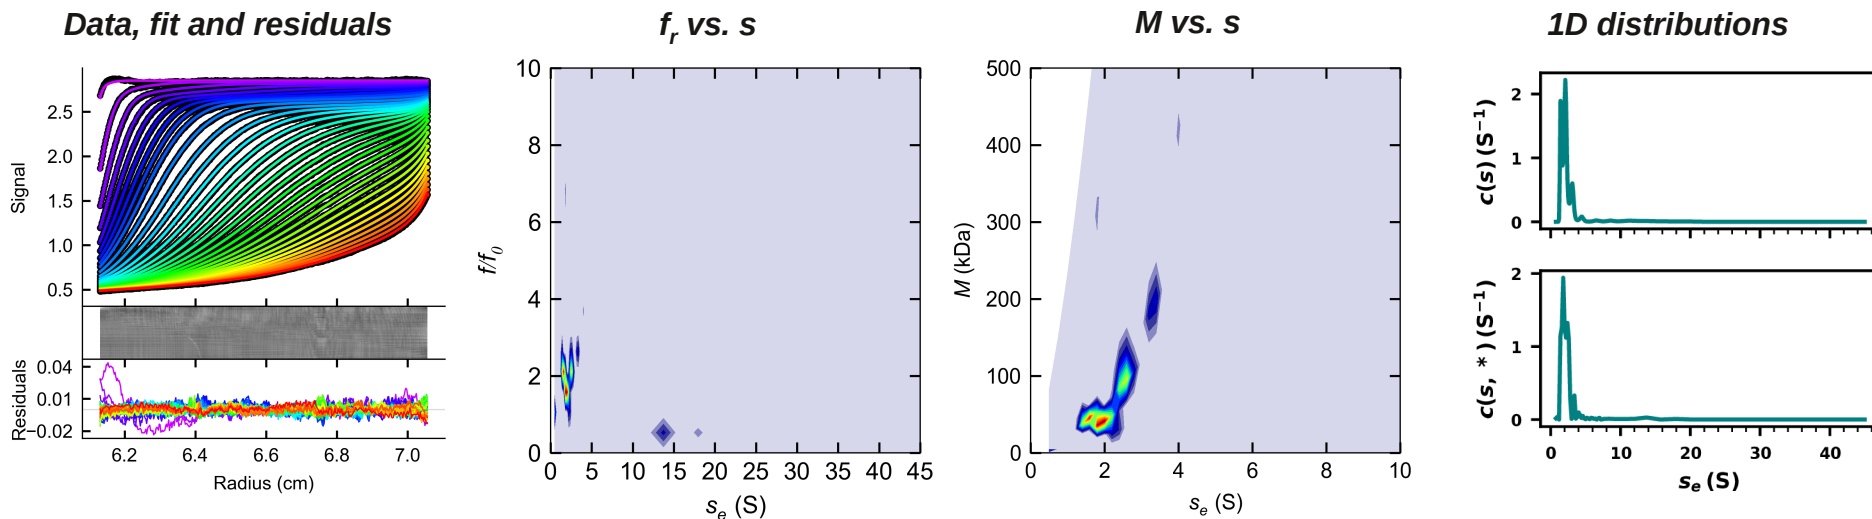

Reduced  $\chi^2$  [r.m.s.d]: [0.003815]

Interference optics @ 42000 rpm - actual concentration 0.44 mg/ml

$c(s, f_r)$  analysis

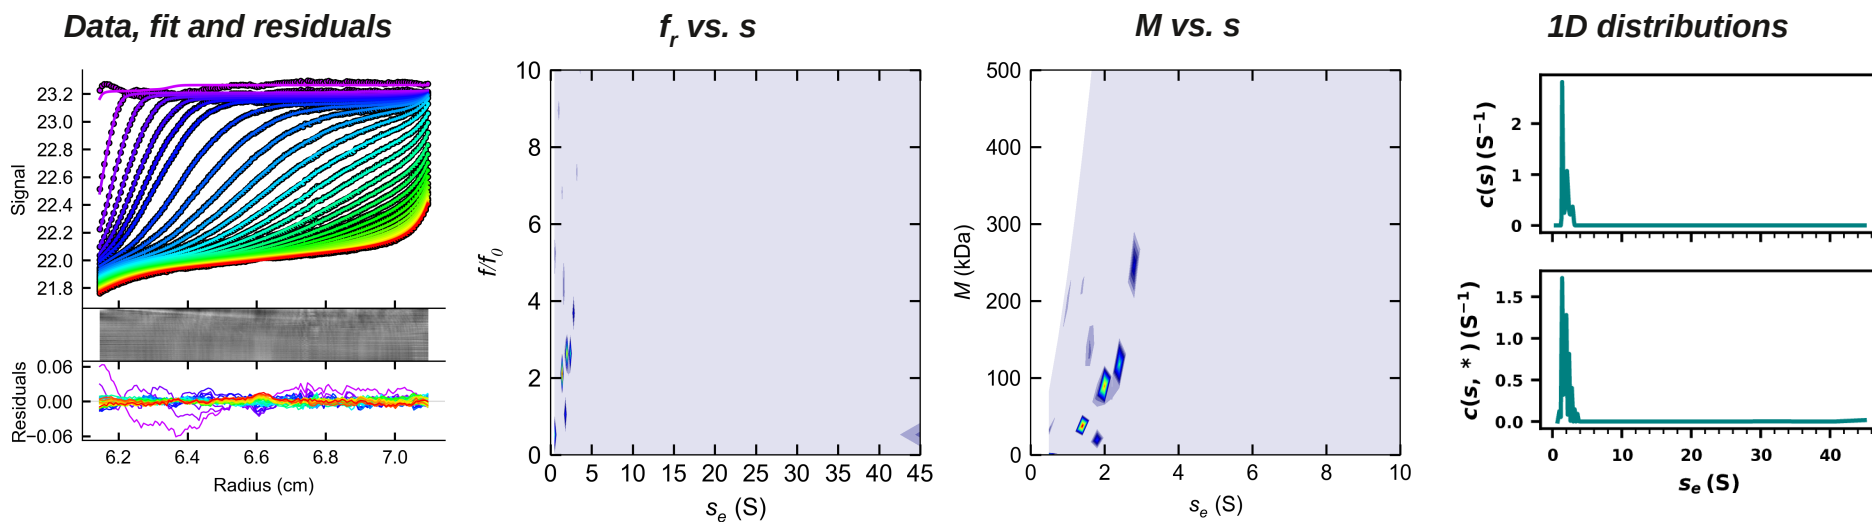

Reduced  $\chi^2$  [r.m.s.d]: [0.006460]

Fig. S6B

# Complex of human PCBP2, PRRSV nsp1- $\beta$ and PRRSV 34 nt ssRNA

Species Analysis (1.00 mg/ml, 30000 rpm, i. o.)

| Parameter                                                 | Value        | 95% confidence interval  |
|-----------------------------------------------------------|--------------|--------------------------|
| <b>Species # 1 (class 1)</b>                              |              |                          |
| Sedimentation coefficient $s_{20^{\circ}\text{C}, w}$ (S) | 2.185538     | 1.9320 - 2.3175          |
| Molecular mass <sup>1</sup> $M$ (Da)                      | 39429.258626 | 31975.1983 - 43851.1943  |
| Concentration (signal)                                    | 0.889672     |                          |
| <b>Species # 2 (class 2)</b>                              |              |                          |
| Sedimentation coefficient $s_{20^{\circ}\text{C}, w}$ (S) | 3.086904     | 2.8131 - 3.3679          |
| Molecular mass <sup>1</sup> $M$ (Da)                      | 64508.620238 | 56946.9871 - 72146.4835  |
| Concentration (signal)                                    | 0.848381     |                          |
| <b>Species # 3 (class 3)</b>                              |              |                          |
| Sedimentation coefficient $s_{20^{\circ}\text{C}, w}$ (S) | 4.413055     | 4.1166 - 4.8238          |
| Molecular mass <sup>1</sup> $M$ (Da)                      | 89133.977232 | 75536.5637 - 117267.7025 |
| Concentration (signal)                                    | 0.327668     |                          |
| <b>Species # 4 (class 5)</b>                              |              |                          |
| Sedimentation coefficient $s_{20^{\circ}\text{C}, w}$ (S) | 8.680858     | 6.5740 - 11.0911         |
| Molecular mass <sup>1</sup> $M$ (Da)                      | 33004.982556 | 27014.9568 - 41589.0286  |
| Concentration (signal)                                    | 0.0689382    |                          |
| <b>Species # 5 (class 6)</b>                              |              |                          |
| Sedimentation coefficient $s_{20^{\circ}\text{C}, w}$ (S) | 18.269621    | 17.2184 - 19.6377        |
| Molecular mass <sup>1</sup> $M$ (Da)                      | 62045.164082 | 50792.5477 - 83330.0656  |
| Concentration (signal)                                    | 0.101118     |                          |
| <b>Common</b>                                             |              |                          |
| Meniscus position (cm)                                    | 6.107007     | 6.1061 - 6.1081          |
| Bottom position (cm)                                      | 7.216139     | 7.2101 - 7.2245          |
| Buffer signal <sup>2</sup> frictional ratio $f_r$         | 2.382192     | 1.8745 - 3.3470          |
| Reduced $\chi^2$ of fit [rmsd]                            | 0.1871007    |                          |
| R.m.s.d. of fit                                           | 0.004326     |                          |

<sup>1</sup>Substitute  $\bar{v} = 0.73 \text{ cm}^3/\text{g}$

<sup>2</sup>Continuous  $c(s)$  from 0.0 - 0.8 S

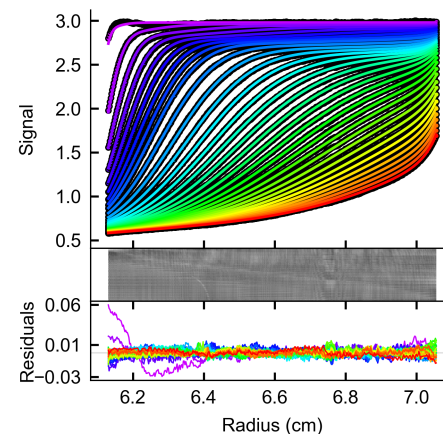

Reduced  $\chi^2$  [r.m.s.d]: 0.187101 [0.004326]

# Complex of human PCBP2, PRRSV nsp1- $\beta$ and PRRSV 34 nt ssRNA

Species Analysis (0.44 mg/ml, 42000 rpm, i. o.)

| Parameter                                                 | Value         | 95% confidence interval  |
|-----------------------------------------------------------|---------------|--------------------------|
| <b>Species # 1 (class 1)</b>                              |               |                          |
| Sedimentation coefficient $s_{20^{\circ}\text{C}, w}$ (S) | 2.045761      | 1.9890 - 2.0955          |
| Molecular mass <sup>1</sup> $M$ (Da)                      | 32468.185230  | 28140.1889 - 35903.1468  |
| Concentration (signal)                                    | 0.564412      |                          |
| <b>Species # 2 (class 2)</b>                              |               |                          |
| Sedimentation coefficient $s_{20^{\circ}\text{C}, w}$ (S) | 2.874757      | 2.7103 - 2.9979          |
| Molecular mass <sup>1</sup> $M$ (Da)                      | 78493.617851  | 67236.8428 - 93921.0463  |
| Concentration (signal)                                    | 0.388871      |                          |
| <b>Species # 3 (class 3)</b>                              |               |                          |
| Sedimentation coefficient $s_{20^{\circ}\text{C}, w}$ (S) | 3.976393      | 3.7610 - 4.1698          |
| Molecular mass <sup>1</sup> $M$ (Da)                      | 131871.067920 | 94586.0501 - 201092.7657 |
| Concentration (signal)                                    | 0.193644      |                          |
| <b>Common</b>                                             |               |                          |
| Meniscus position (cm)                                    | 6.107400      | 6.1056 - 6.1093          |
| Bottom position (cm)                                      | 7.201615      | 7.1931 - 7.2121          |
| Buffer signal <sup>2</sup> frictional ratio $f_r$         | 1.481410      | 1.2663 - 1.9532          |
| Reduced $\chi^2$ of fit [rmsd]                            | 0.5931672     |                          |
| R.m.s.d. of fit                                           | 0.007702      |                          |

<sup>1</sup>Substitute  $\bar{v} = 0.73 \text{ cm}^3/\text{g}$

<sup>2</sup>Continuous  $c(s)$  from 0.0 - 0.8 S

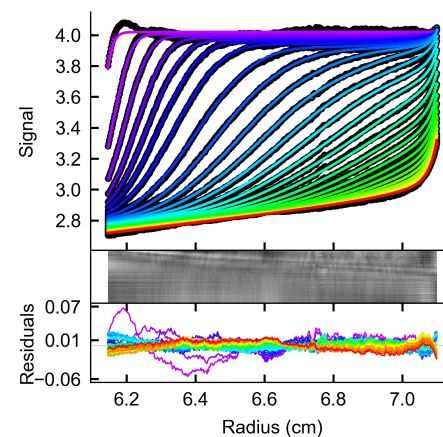

Reduced  $\chi^2$  [r.m.s.d]: 0.593167 [0.007702]



# Complex of human PCBP2, PRRSV nsp1- $\beta$ and PRRSV 34 nt ssRNA

Absorbance optics @ 30000 rpm - loading concentration 2.0 mg/ml

$c(s, f_r)$  analysis

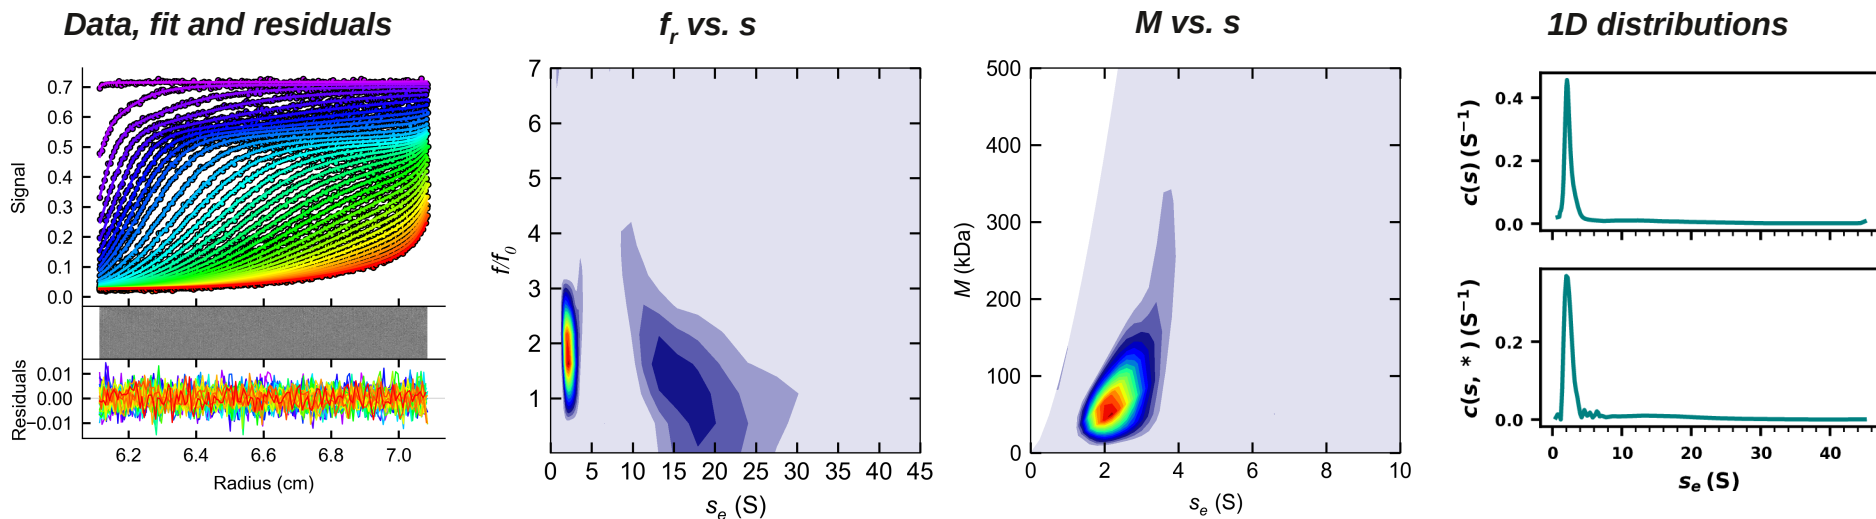

Reduced  $\chi^2$  [r.m.s.d]: [0.003730]

Absorbance optics @ 42000 rpm - actual concentration 0.75 mg/ml

$c(s, f_r)$  analysis

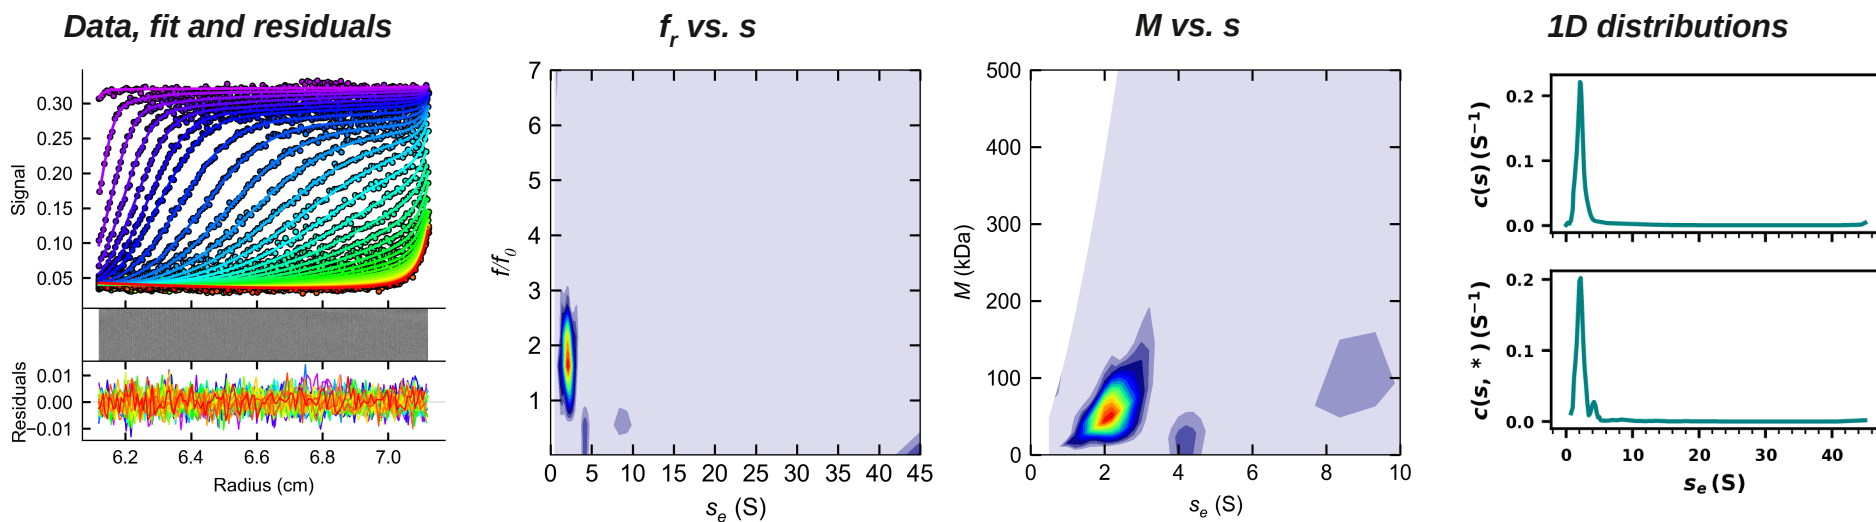

Reduced  $\chi^2$  [r.m.s.d]: [0.003382]

Fig. S6E

# Complex of human PCBP2, PRRSV nsp1- $\beta$ and PRRSV 34 nt ssRNA

Interference optics @ 30000 rpm - loading concentration 2.0 mg/ml

$c(s, f_r)$  analysis

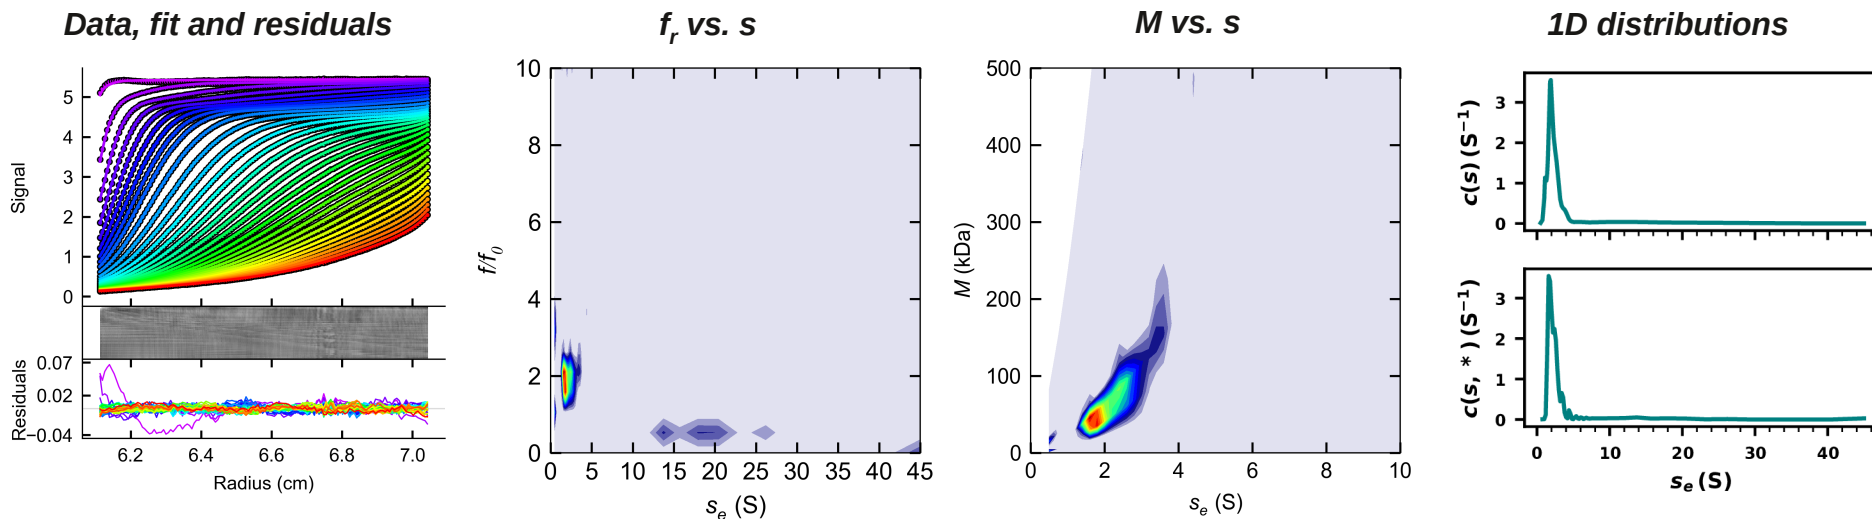

Reduced  $\chi^2$  [r.m.s.d]: [0.005117]

Interference optics @ 42000 rpm - actual concentration 0.75 mg/ml

$c(s, f_r)$  analysis

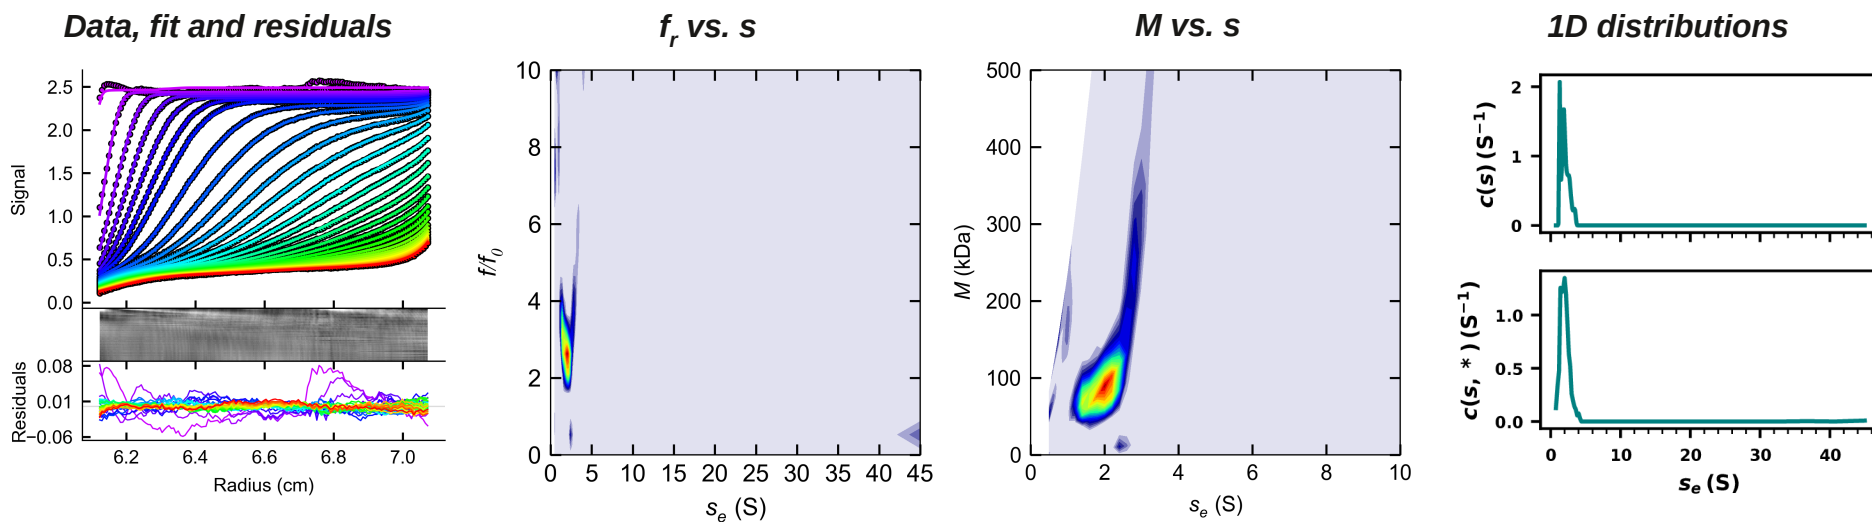

Reduced  $\chi^2$  [r.m.s.d]: [0.009482]

Fig. S6F



# Complex of human PCBP2, PRRSV nsp1- $\beta$ and PRRSV 34 nt ssRNA

Species Analysis (2.00 mg/ml, 30000 rpm, i. o.)

| Parameter                                                 | Value         | 95% confidence interval  |
|-----------------------------------------------------------|---------------|--------------------------|
| <b>Species # 1 (class 1)</b>                              |               |                          |
| Sedimentation coefficient $s_{20^{\circ}\text{C}, w}$ (S) | 2.259298      | 2.1789 - 2.3345          |
| Molecular mass <sup>1</sup> $M$ (Da)                      | 40911.383621  | 39015.7993 - 42569.8757  |
| Concentration (signal)                                    | 2.10665       |                          |
| <b>Species # 2 (class 2)</b>                              |               |                          |
| Sedimentation coefficient $s_{20^{\circ}\text{C}, w}$ (S) | 3.362426      | 3.2647 - 3.4499          |
| Molecular mass <sup>1</sup> $M$ (Da)                      | 70607.408753  | 66954.0626 - 74408.5887  |
| Concentration (signal)                                    | 1.80079       |                          |
| <b>Species # 3 (class 3)</b>                              |               |                          |
| Sedimentation coefficient $s_{20^{\circ}\text{C}, w}$ (S) | 4.879189      | 4.7237 - 4.9818          |
| Molecular mass <sup>1</sup> $M$ (Da)                      | 104525.361816 | 94748.6103 - 115580.2252 |
| Concentration (signal)                                    | 0.557564      |                          |
| <b>Species # 4 (class 5)</b>                              |               |                          |
| Sedimentation coefficient $s_{20^{\circ}\text{C}, w}$ (S) | 9.007732      | 7.8572 - 10.1107         |
| Molecular mass <sup>1</sup> $M$ (Da)                      | 49129.251609  | 38405.4058 - 69148.1903  |
| Concentration (signal)                                    | 0.179173      |                          |
| <b>Species # 5 (class 6)</b>                              |               |                          |
| Sedimentation coefficient $s_{20^{\circ}\text{C}, w}$ (S) | 16.172510     | 15.2395 - 17.1308        |
| Molecular mass <sup>1</sup> $M$ (Da)                      | 114826.491328 | 86165.0080 - 173746.5190 |
| Concentration (signal)                                    | 0.15973       |                          |
| <b>Species # 6 (class 7)</b>                              |               |                          |
| Sedimentation coefficient $s_{20^{\circ}\text{C}, w}$ (S) | 24.574698     | 23.3895 - 25.9063        |
| Molecular mass <sup>1</sup> $M$ (Da)                      | 42732.956296  | 38685.9354 - 49078.2030  |
| Concentration (signal)                                    | 0.337733      |                          |
| <b>Common</b>                                             |               |                          |
| Meniscus position (cm)                                    | 6.078588      | 6.0778 - 6.0790          |
| Bottom position (cm)                                      | 7.233989      | 7.2288 - 7.2399          |
| Buffer signal <sup>2</sup> frictional ratio $f_r$         | 3.336644      | 2.8806 - 3.9916          |
| Reduced $\chi^2$ of fit [rmsd]                            | 0.3392895     |                          |
| R.m.s.d. of fit                                           | 0.005825      |                          |

<sup>1</sup>Substitute  $\bar{v} = 0.73 \text{ cm}^3/\text{g}$

<sup>2</sup>Continuous  $c(s)$  from 0.0 - 0.8 S

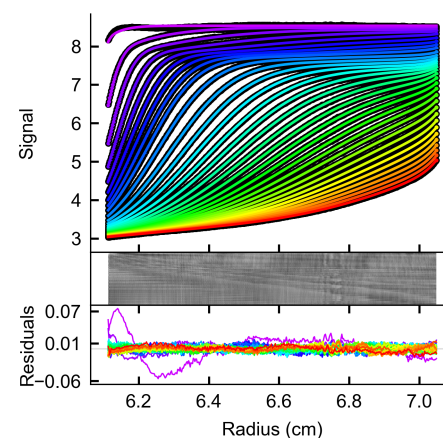

Reduced  $\chi^2$  [r.m.s.d]: 0.339290 [0.005825]

# Complex of human PCBP2, PRRSV nsp1- $\beta$ and PRRSV 34 nt ssRNA

Species Analysis (0.75 mg/ml, 42000 rpm, i. o.)

| Parameter                                                 | Value         | 95% confidence interval   |
|-----------------------------------------------------------|---------------|---------------------------|
| <b>Species # 1 (class 1)</b>                              |               |                           |
| Sedimentation coefficient $s_{20^{\circ}\text{C}, w}$ (S) | 1.737800      | 1.6152 - 1.8163           |
| Molecular mass <sup>1</sup> $M$ (Da)                      | 42836.913056  | 36022.7457 - 53638.9211   |
| Concentration (signal)                                    | 0.488908      |                           |
| <b>Species # 2 (class 2)</b>                              |               |                           |
| Sedimentation coefficient $s_{20^{\circ}\text{C}, w}$ (S) | 2.545311      | 2.3295 - 2.6511           |
| Molecular mass <sup>1</sup> $M$ (Da)                      | 65269.106310  | 58823.6621 - 72195.2814   |
| Concentration (signal)                                    | 0.869682      |                           |
| <b>Species # 3 (class 3)</b>                              |               |                           |
| Sedimentation coefficient $s_{20^{\circ}\text{C}, w}$ (S) | 3.497679      | 3.2748 - 3.6633           |
| Molecular mass <sup>1</sup> $M$ (Da)                      | 112116.879536 | 90117.1719 - 141988.8079  |
| Concentration (signal)                                    | 0.526914      |                           |
| <b>Species # 4 (class 4)</b>                              |               |                           |
| Sedimentation coefficient $s_{20^{\circ}\text{C}, w}$ (S) | 4.655214      | 4.3692 - 4.8847           |
| Molecular mass <sup>1</sup> $M$ (Da)                      | 232327.712281 | 148281.3925 - 426686.8809 |
| Concentration (signal)                                    | 0.156663      |                           |
| <b>Common</b>                                             |               |                           |
| Meniscus position (cm)                                    | 6.093045      | 6.0911 - 6.0950           |
| Bottom position (cm)                                      | 7.175154      | 7.1615 - 7.1904           |
| Buffer signal <sup>2</sup> frictional ratio $f_r$         | 5.718135      | 4.3407 - 7.4711           |
| Reduced $\chi^2$ of fit [rmsd]                            | 0.9201238     |                           |
| R.m.s.d. of fit                                           | 0.009592      |                           |

<sup>1</sup>Substitute  $\bar{v} = 0.73 \text{ cm}^3/\text{g}$

<sup>2</sup>Continuous  $c(s)$  from 0.0 - 0.8 S

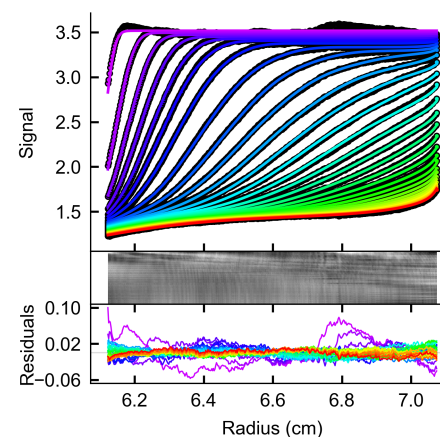

Reduced  $\chi^2$  [r.m.s.d]: 0.920124 [0.009592]

# Complex of human PCBP2, PRRSV nsp1- $\beta$ and PRRSV 34 nt ssRNA

Absorbance optics @ 30000 rpm - loading concentration 4.0 mg/ml

$c(s, f_r)$  analysis

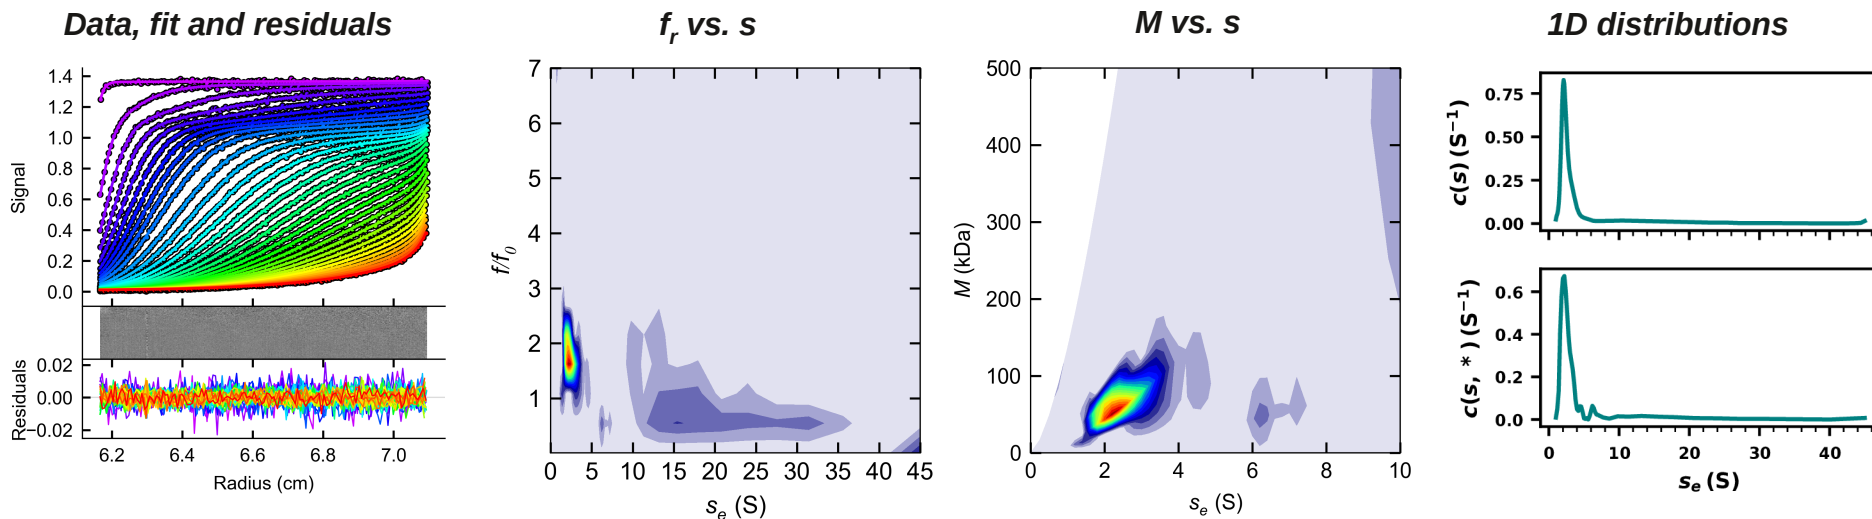

Reduced  $\chi^2$  [r.m.s.d]: [0.004508]

Absorbance optics @ 42000 rpm - actual concentration 1.09 mg/ml

$c(s, f_r)$  analysis

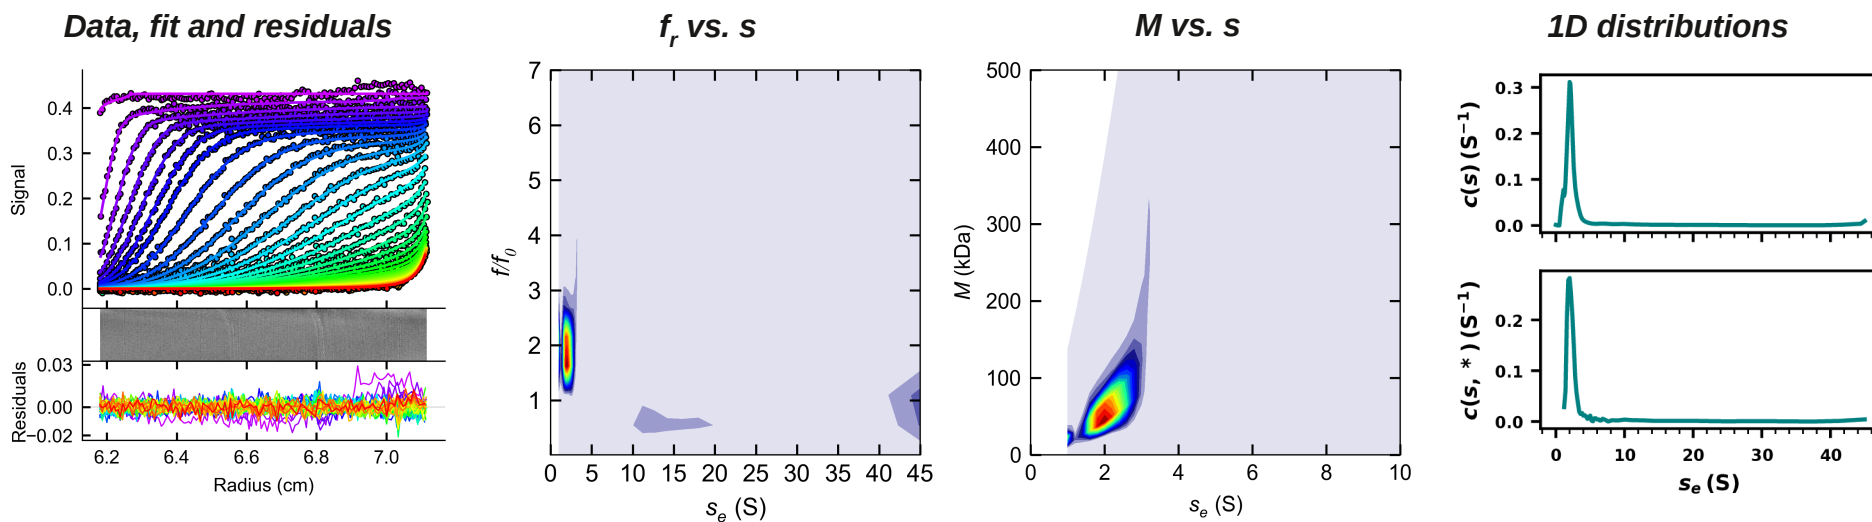

Reduced  $\chi^2$  [r.m.s.d]: [0.004322]

Fig. S6I

# Complex of human PCBP2, PRRSV nsp1- $\beta$ and PRRSV 34 nt ssRNA

Interference optics @ 30000 rpm - loading concentration 4.0 mg/ml

$c(s, f_r)$  analysis

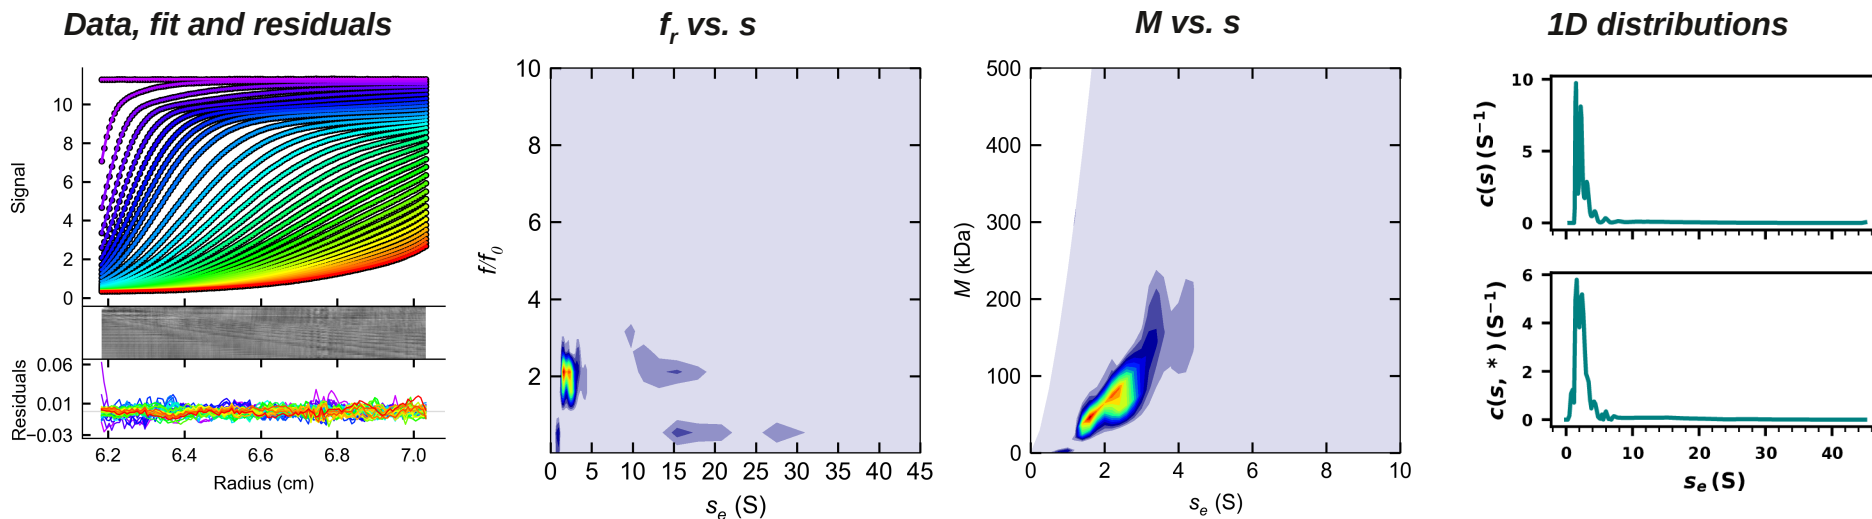

Reduced  $\chi^2$  [r.m.s.d]: [0.005735]

Interference optics @ 42000 rpm - actual concentration 1.09 mg/ml

$c(s, f_r)$  analysis

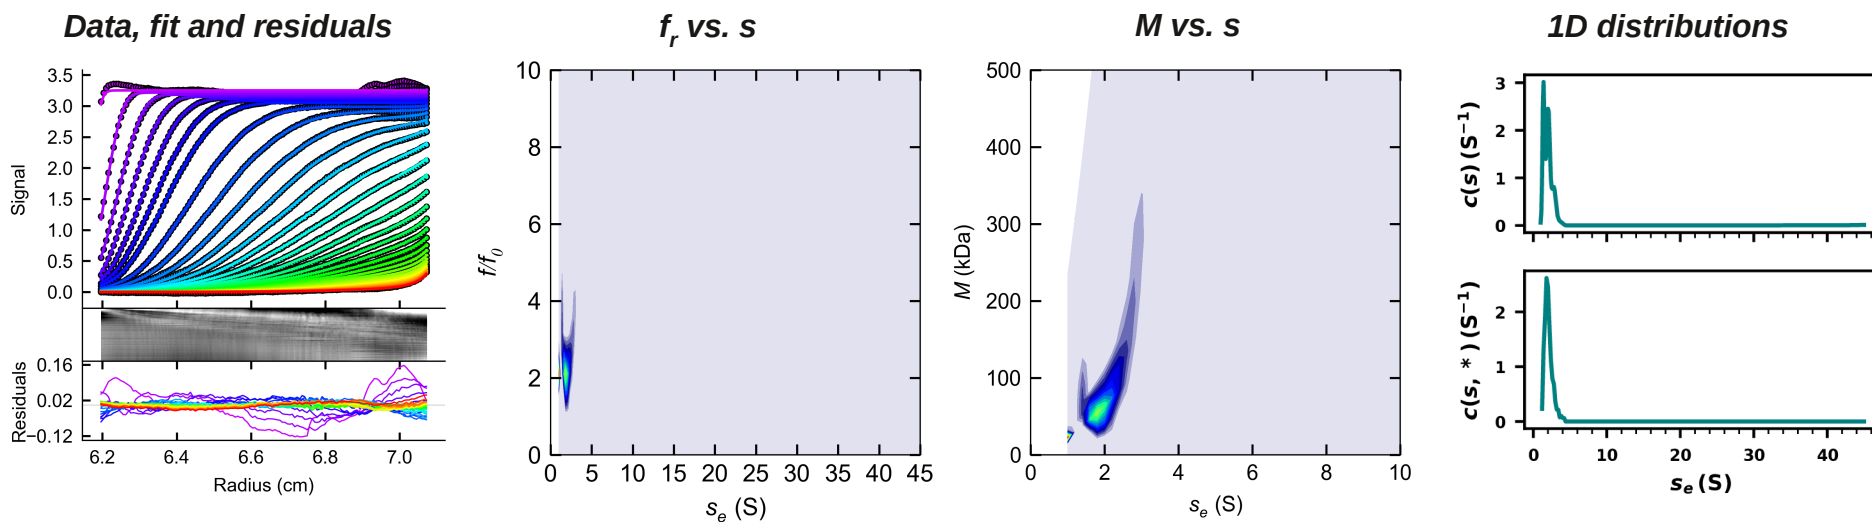

Reduced  $\chi^2$  [r.m.s.d]: [0.019392]

Fig. S6J

# Complex of human PCBP2, PRRSV nsp1- $\beta$ and PRRSV 34 nt ssRNA

Species Analysis (4.00 mg/ml, 30000 rpm, i. o.)

| Parameter                                                 | Value         | 95% confidence interval   |
|-----------------------------------------------------------|---------------|---------------------------|
| <b>Species # 1 (class 1)</b>                              |               |                           |
| Sedimentation coefficient $s_{20^{\circ}\text{C}, w}$ (S) | 1.893838      | 1.8767 - 1.9115           |
| Molecular mass <sup>1</sup> $M$ (Da)                      | 36242.513823  | 35605.9184 - 36924.8539   |
| Concentration (signal)                                    | 2.02274       |                           |
| <b>Species # 2 (class 2)</b>                              |               |                           |
| Sedimentation coefficient $s_{20^{\circ}\text{C}, w}$ (S) | 2.895957      | 2.8717 - 3.0216           |
| Molecular mass <sup>1</sup> $M$ (Da)                      | 56798.604800  | 56171.7866 - 57417.8843   |
| Concentration (signal)                                    | 4.20148       |                           |
| <b>Species # 3 (class 3)</b>                              |               |                           |
| Sedimentation coefficient $s_{20^{\circ}\text{C}, w}$ (S) | 4.032742      | 3.7914 - 4.0755           |
| Molecular mass <sup>1</sup> $M$ (Da)                      | 91110.192293  | 88642.3598 - 93600.9839   |
| Concentration (signal)                                    | 2.17643       |                           |
| <b>Species # 4 (class 4)</b>                              |               |                           |
| Sedimentation coefficient $s_{20^{\circ}\text{C}, w}$ (S) | 5.558437      | 5.5059 - 5.7911           |
| Molecular mass <sup>1</sup> $M$ (Da)                      | 106503.214501 | 97771.9841 - 113202.5506  |
| Concentration (signal)                                    | 0.924506      |                           |
| <b>Species # 5 (class 5)</b>                              |               |                           |
| Sedimentation coefficient $s_{20^{\circ}\text{C}, w}$ (S) | 9.980081      | 9.6854 - 10.2378          |
| Molecular mass <sup>1</sup> $M$ (Da)                      | 55993.213184  | 50533.5330 - 65497.6998   |
| Concentration (signal)                                    | 0.504232      |                           |
| <b>Species # 6 (class 6)</b>                              |               |                           |
| Sedimentation coefficient $s_{20^{\circ}\text{C}, w}$ (S) | 18.163020     | 17.9089 - 18.4664         |
| Molecular mass <sup>1</sup> $M$ (Da)                      | 116367.123008 | 102061.2320 - 138132.1828 |
| Concentration (signal)                                    | 0.460625      |                           |
| <b>Species # 7 (class 7)</b>                              |               |                           |
| Sedimentation coefficient $s_{20^{\circ}\text{C}, w}$ (S) | 28.605184     | 27.7262 - 30.0465         |
| Molecular mass <sup>1</sup> $M$ (Da)                      | 50122.522087  | 49947.7361 - 50312.8130   |
| Concentration (signal)                                    | 0.500927      |                           |
| <b>Common</b>                                             |               |                           |
| Meniscus position (cm)                                    | 6.154459      | 6.1540 - 6.1548           |
| Bottom position (cm)                                      | 7.219491      | 7.2170 - 7.2245           |
| Buffer signal <sup>2</sup> frictional ratio $f_r$         | 1.126869      | 0.9060 - 1.3521           |
| Reduced $\chi^2$ of fit [rmsd]                            | 0.5273897     |                           |
| R.m.s.d. of fit                                           | 0.007262      |                           |

<sup>1</sup>Substitute  $\bar{v} = 0.73 \text{ cm}^3/\text{g}$

<sup>2</sup>Continuous  $c(s)$  from 0.0 - 0.8 S

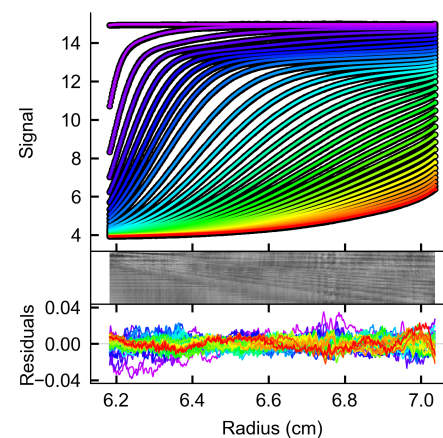

Reduced  $\chi^2$  [r.m.s.d]: 0.527390 [0.007262]

# Complex of human PCBP2, PRRSV nsp1- $\beta$ and PRRSV 34 nt ssRNA

Species Analysis (1.09 mg/ml, 42000 rpm, i. o.)

| Parameter                                                 | Value         | 95% confidence interval  |
|-----------------------------------------------------------|---------------|--------------------------|
| <b>Species # 1 (class X)</b>                              |               |                          |
| Sedimentation coefficient $s_{20^{\circ}\text{C}, w}$ (S) | 1.209722      | 0.8561 - 1.7601          |
| Molecular mass <sup>1</sup> $M$ (Da)                      | 30400.731201  | 20063.1666 - >900000     |
| Concentration (signal)                                    | 0.255537      |                          |
| <b>Species # 2 (class 1)</b>                              |               |                          |
| Sedimentation coefficient $s_{20^{\circ}\text{C}, w}$ (S) | 1.922069      | 1.7474 - 2.6281          |
| Molecular mass <sup>1</sup> $M$ (Da)                      | 49646.909726  | 42877.4221 - 61527.1873  |
| Concentration (signal)                                    | 0.962814      |                          |
| <b>Species # 3 (class 2)</b>                              |               |                          |
| Sedimentation coefficient $s_{20^{\circ}\text{C}, w}$ (S) | 2.787625      | 2.5211 - 3.3593          |
| Molecular mass <sup>1</sup> $M$ (Da)                      | 64072.302750  | 54843.6506 - 109988.7832 |
| Concentration (signal)                                    | 1.43393       |                          |
| <b>Species # 4 (class 3)</b>                              |               |                          |
| Sedimentation coefficient $s_{20^{\circ}\text{C}, w}$ (S) | 3.776941      | 3.3105 - 4.1561          |
| Molecular mass <sup>1</sup> $M$ (Da)                      | 136947.108751 | 87118.2414 - 219814.9212 |
| Concentration (signal)                                    | 0.4912        |                          |
| <b>Species # 5 (class 4)</b>                              |               |                          |
| Sedimentation coefficient $s_{20^{\circ}\text{C}, w}$ (S) | 4.936165      | 4.2947 - 5.5977          |
| Molecular mass <sup>1</sup> $M$ (Da)                      | 273002.737766 | 108529.5424 - >900000    |
| Concentration (signal)                                    | 0.119144      |                          |
| <b>Common</b>                                             |               |                          |
| Meniscus position (cm)                                    | 6.169227      | 6.1674 - 6.1710          |
| Bottom position (cm)                                      | 7.181567      | 7.1682 - 7.2017          |
| Buffer signal <sup>2</sup> frictional ratio $f_r$         | 4.608594      | 2.9507 - 28.0506         |
| Reduced $\chi^2$ of fit [rmsd]                            | 3.344057      |                          |
| R.m.s.d. of fit                                           | 0.018287      |                          |

<sup>1</sup>Substitute  $\bar{v} = 0.73 \text{ cm}^3/\text{g}$

<sup>2</sup>Continuous  $c(s)$  from 0.0 - 0.8 S

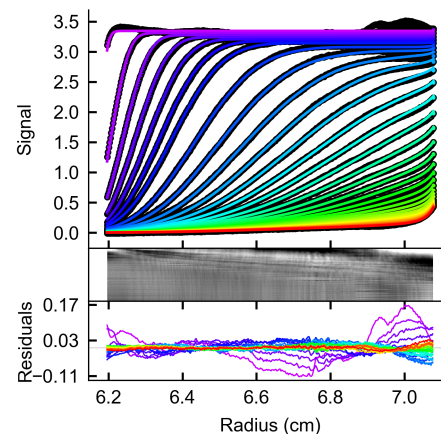

Reduced  $\chi^2$  [r.m.s.d]: 3.344057 [0.018287]



## **Section 3:**

# **Characterization of Human PCBP2, PRRSV nsp1- $\beta$ and PRRSV 34 nt ssRNA Complex by SEC-SAXS**

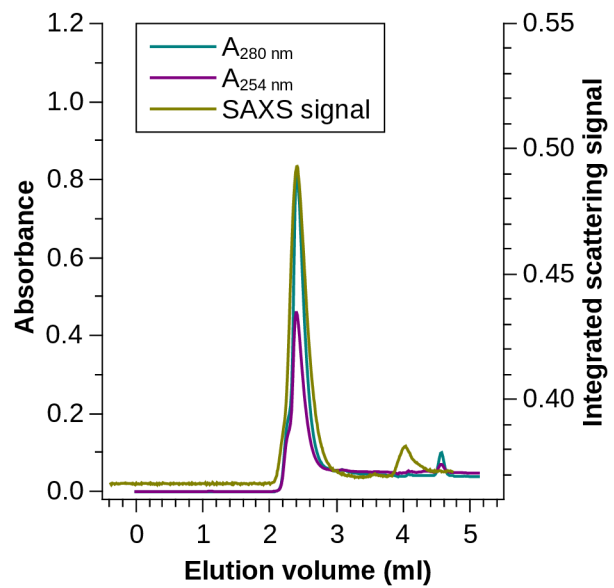

Fig. S7
